# Supplementary material
Source: PubMed Central journal article supplement (PMC3268459)

**Supporting Information: Neopetrosiquinones A and B, Sesquiterpene Benzoquinones Isolated from a Deep-water Sponge *Neopetrosia cf. proxima***

Priscilla L. Winder<sup>1</sup>, Heather L. Baker<sup>1</sup>, Patricia Linley<sup>1</sup>, Esther Guzmán<sup>1</sup>, John K. Reed<sup>1</sup>, Shirley A. Pomponi<sup>1</sup>, M. Cristina Diaz<sup>2</sup>, and Amy E. Wright<sup>1\*</sup>

<sup>1</sup> Harbor Branch Oceanographic Institute at Florida Atlantic University, Center for Marine Biomedical and Biotechnology Research, 5600 US 1 North, Fort Pierce, FL 34946

<sup>2</sup> Museo Marino de Margarita, Nueva Esparta, Venezuela

- S1: Planar structure of neopetrosiquinone A (**1**) and B (**2**) derived from gDQF-COSY and key gHMBC correlations, 600 MHz, CD<sub>2</sub>Cl<sub>2</sub>
- S2: <sup>1</sup>H NMR spectrum of neopetrosiquinone A (**1**), 600 MHz, CD<sub>2</sub>Cl<sub>2</sub>
- S3: Expansion of <sup>1</sup>H NMR spectrum of neopetrosiquinone A (**1**), 600 MHz, CD<sub>2</sub>Cl<sub>2</sub>
- S4: <sup>13</sup>C NMR spectrum of neopetrosiquinone A (**1**), 150.1 MHz, CD<sub>2</sub>Cl<sub>2</sub>
- S5: edited gHSQC spectrum of neopetrosiquinone A (**1**), 600 MHz, CD<sub>2</sub>Cl<sub>2</sub>
- S6: Expansion of gHSQC neopetrosiquinone (**1**), 600 MHz, CD<sub>2</sub>Cl<sub>2</sub>
- S7: gDQF-COSY spectrum of neopetrosiquinone A (**1**), 600 MHz, CD<sub>2</sub>Cl<sub>2</sub>
- S8: Expansion of gDQF-COSY spectrum of neopetrosiquinone A (**1**), 600 MHz, CD<sub>2</sub>Cl<sub>2</sub>
- S9: gHMBC spectrum of neopetrosiquinone A (**1**), 600 MHz, CD<sub>2</sub>Cl<sub>2</sub>
- S10: NOESY spectrum of neopetrosiquinone A (**1**), 600 MHz, CD<sub>2</sub>Cl<sub>2</sub>
- S11: TOCSY spectrum of neopetrosiquinone A (**1**), 600 MHz, CD<sub>2</sub>Cl<sub>2</sub>
- S12: <sup>1</sup>H NMR spectrum of neopetrosiquinone A (**1**), 600 MHz, CD<sub>2</sub>Cl<sub>2</sub>:CD<sub>3</sub>OD (1:1)
- S13: <sup>1</sup>H and <sup>13</sup>C NMR Data for neopetrosiquinone A (**1**)
- S14: Structure of neopetrosiquinone A (**1**) with chemical shifts on structure
- S15: <sup>1</sup>H NMR spectrum of neopetrosiquinone B (**2**), 600 MHz, CDCl<sub>3</sub>
- S16: Expansion of <sup>1</sup>H NMR spectrum of neopetrosiquinone B (**2**), 600 MHz, CDCl<sub>3</sub>
- S17: <sup>13</sup>C NMR spectrum of neopetrosiquinone B (**2**), 150.1 MHz, CDCl<sub>3</sub>
- S18: edited gHSQC spectrum of neopetrosiquinone B (**2**), 600 MHz, CDCl<sub>3</sub>
- S19: Expansion of gHSQC spectrum of neopetrosiquinone B (**2**), 600 MHz, CD<sub>2</sub>Cl<sub>2</sub>
- S20: gDQF-COSY spectrum of neopetrosiquinone B (**2**), 600 MHz, CDCl<sub>3</sub>
- S21: Expansion of gDQF-COSY spectrum of neopetrosiquinone B (**2**), 600 MHz, CD<sub>2</sub>Cl<sub>2</sub>
- S22: gHMBC spectrum of neopetrosiquinone B (**2**), 600 MHz, CDCl<sub>3</sub>
- S23: NOESY spectrum of neopetrosiquinone B (**2**), 600 MHz, CDCl<sub>3</sub>
- S24: TOCSY spectrum of neopetrosiquinone B (**2**), 600 MHz, CDCl<sub>3</sub>
- S25: <sup>1</sup>H and <sup>13</sup>C NMR Data for neopetrosiquinone B (**2**)
- S26: Structure of neopetrosiquinone B (**2**) with chemical shifts on structure

S1: Planar structure of neopetrosiquinones A (**1**) and B (**2**) derived from gDQF-COSY and key gHMBC correlations, 600 MHz, CD<sub>2</sub>Cl<sub>2</sub>

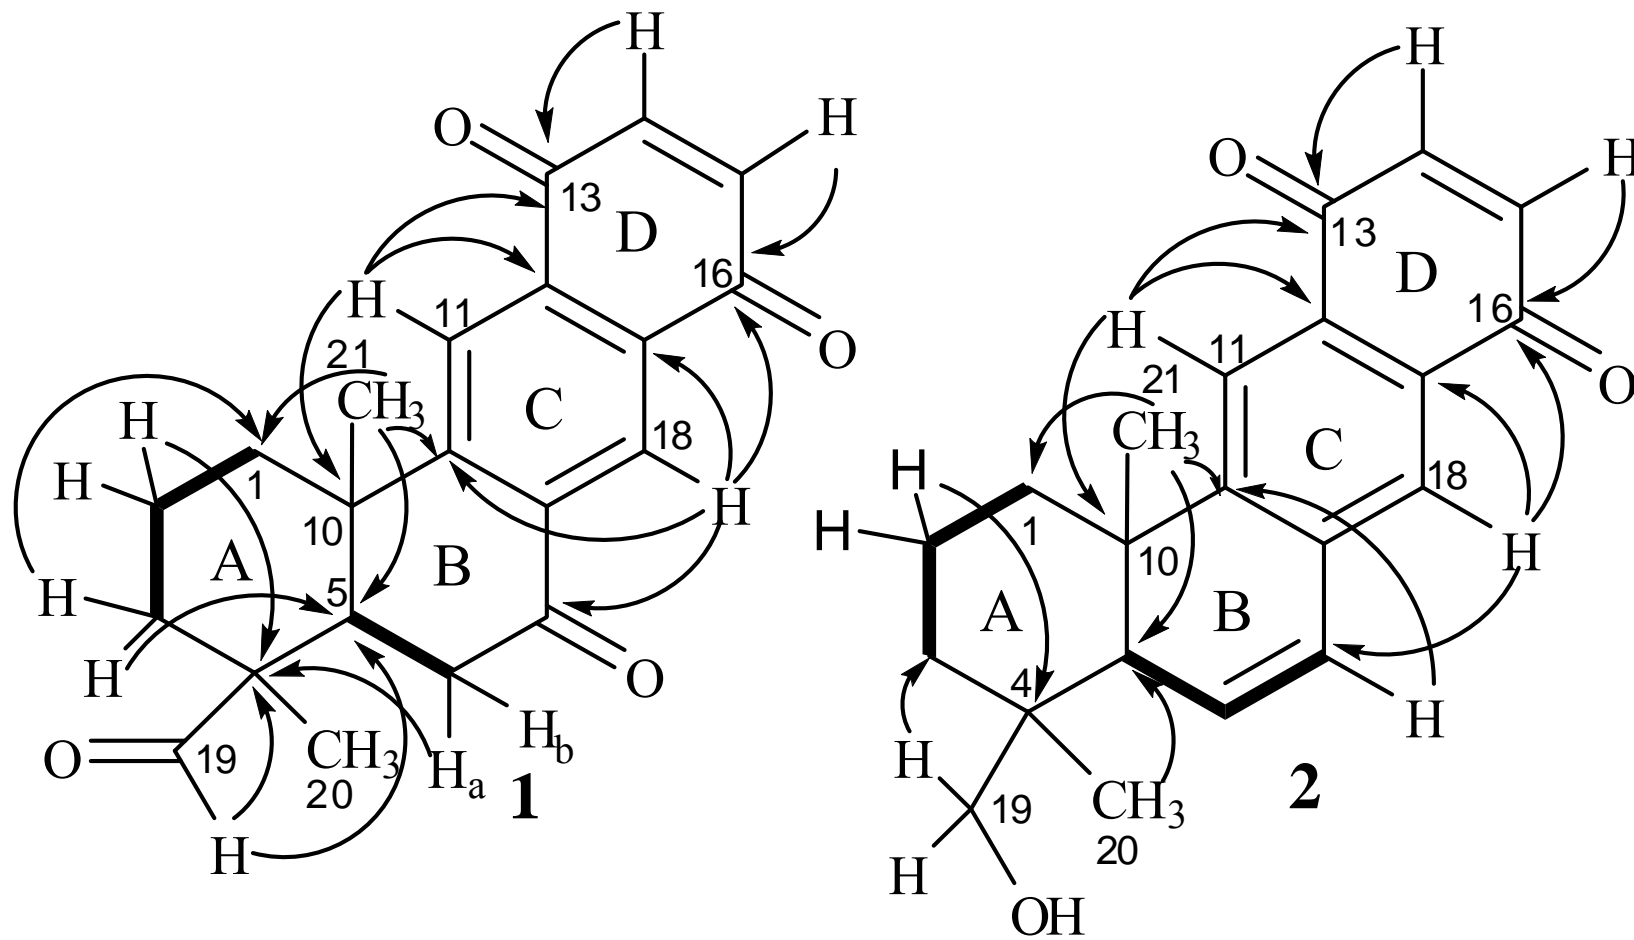

S2:  $^1\text{H}$  NMR spectrum of neopetrosiquinone A (**1**), 600 MHz,  $\text{CD}_2\text{Cl}_2$

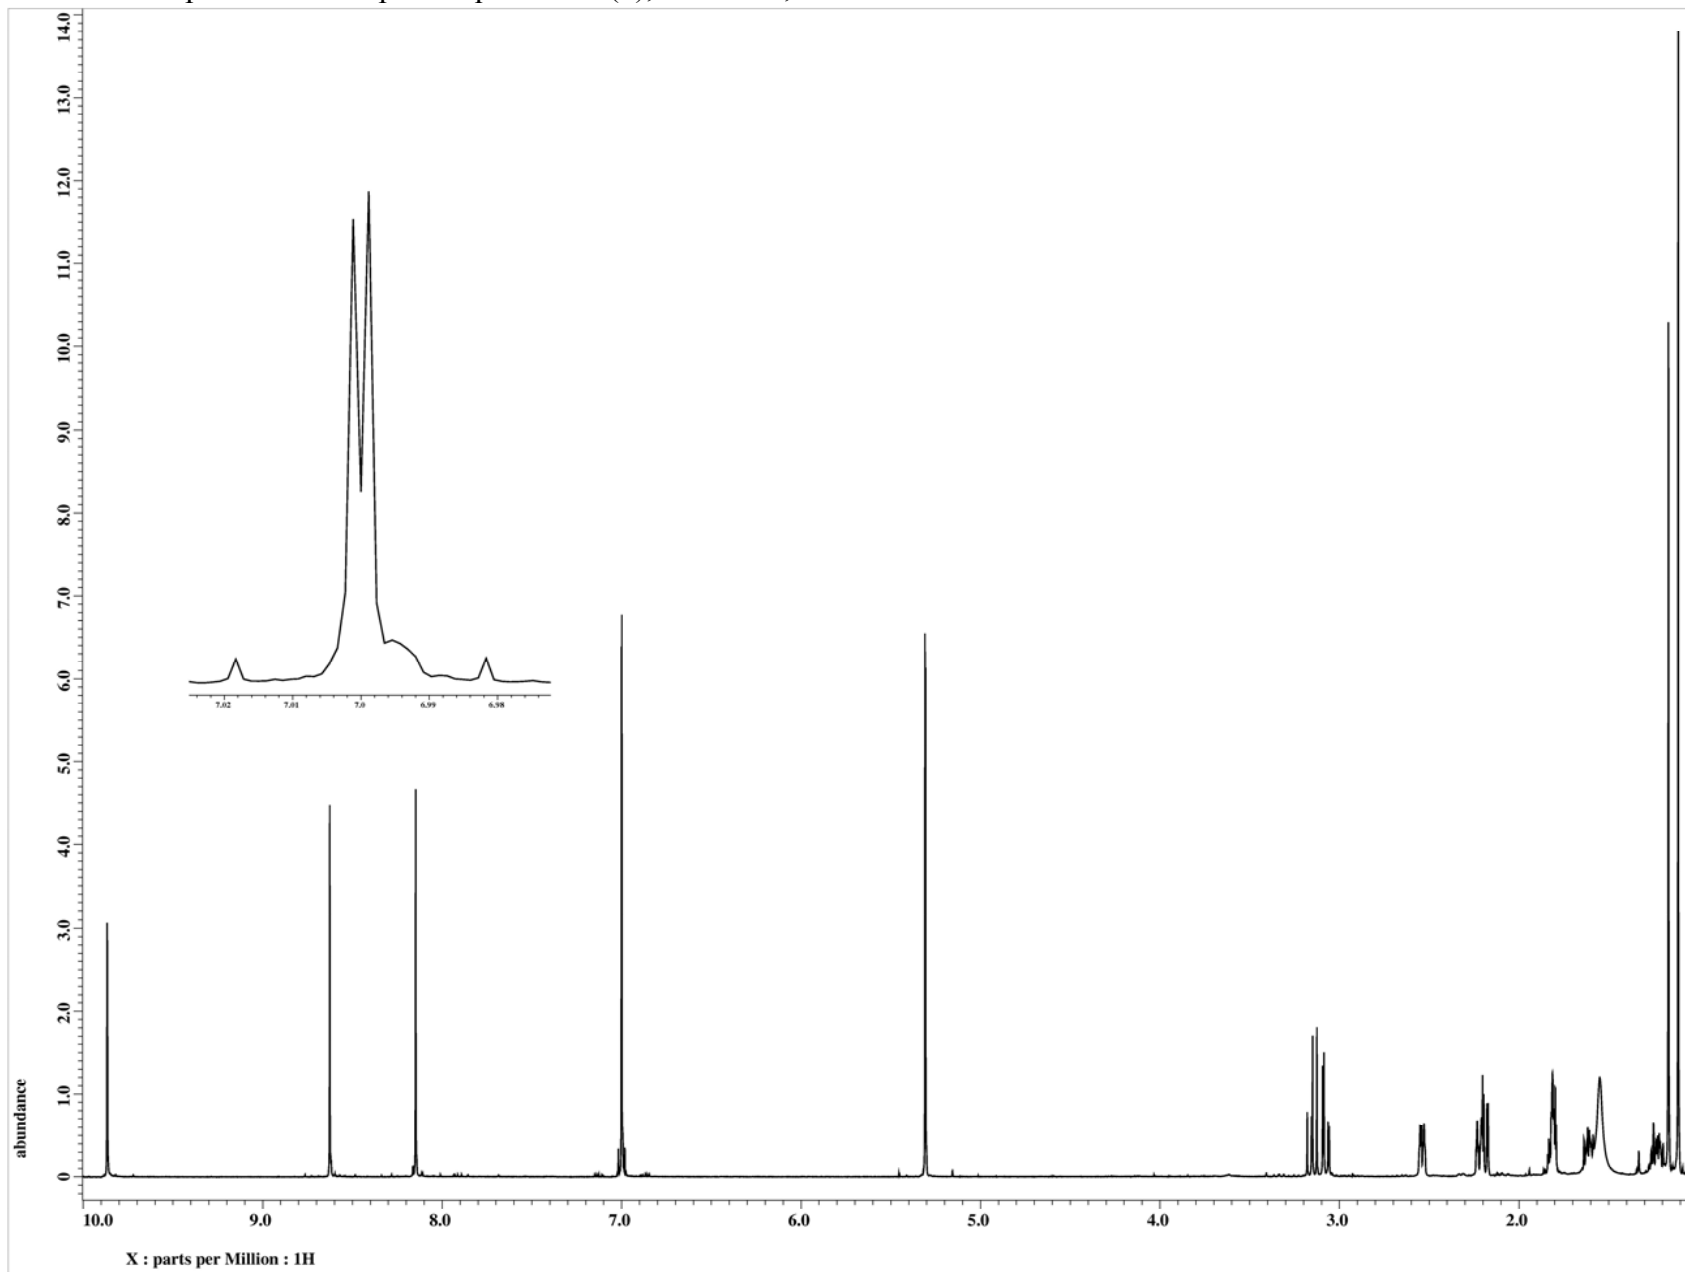

S3: Expansion of  $^1\text{H}$  NMR spectrum of neopetrosiquinone A (**1**), 600 MHz,  $\text{CD}_2\text{Cl}_2$

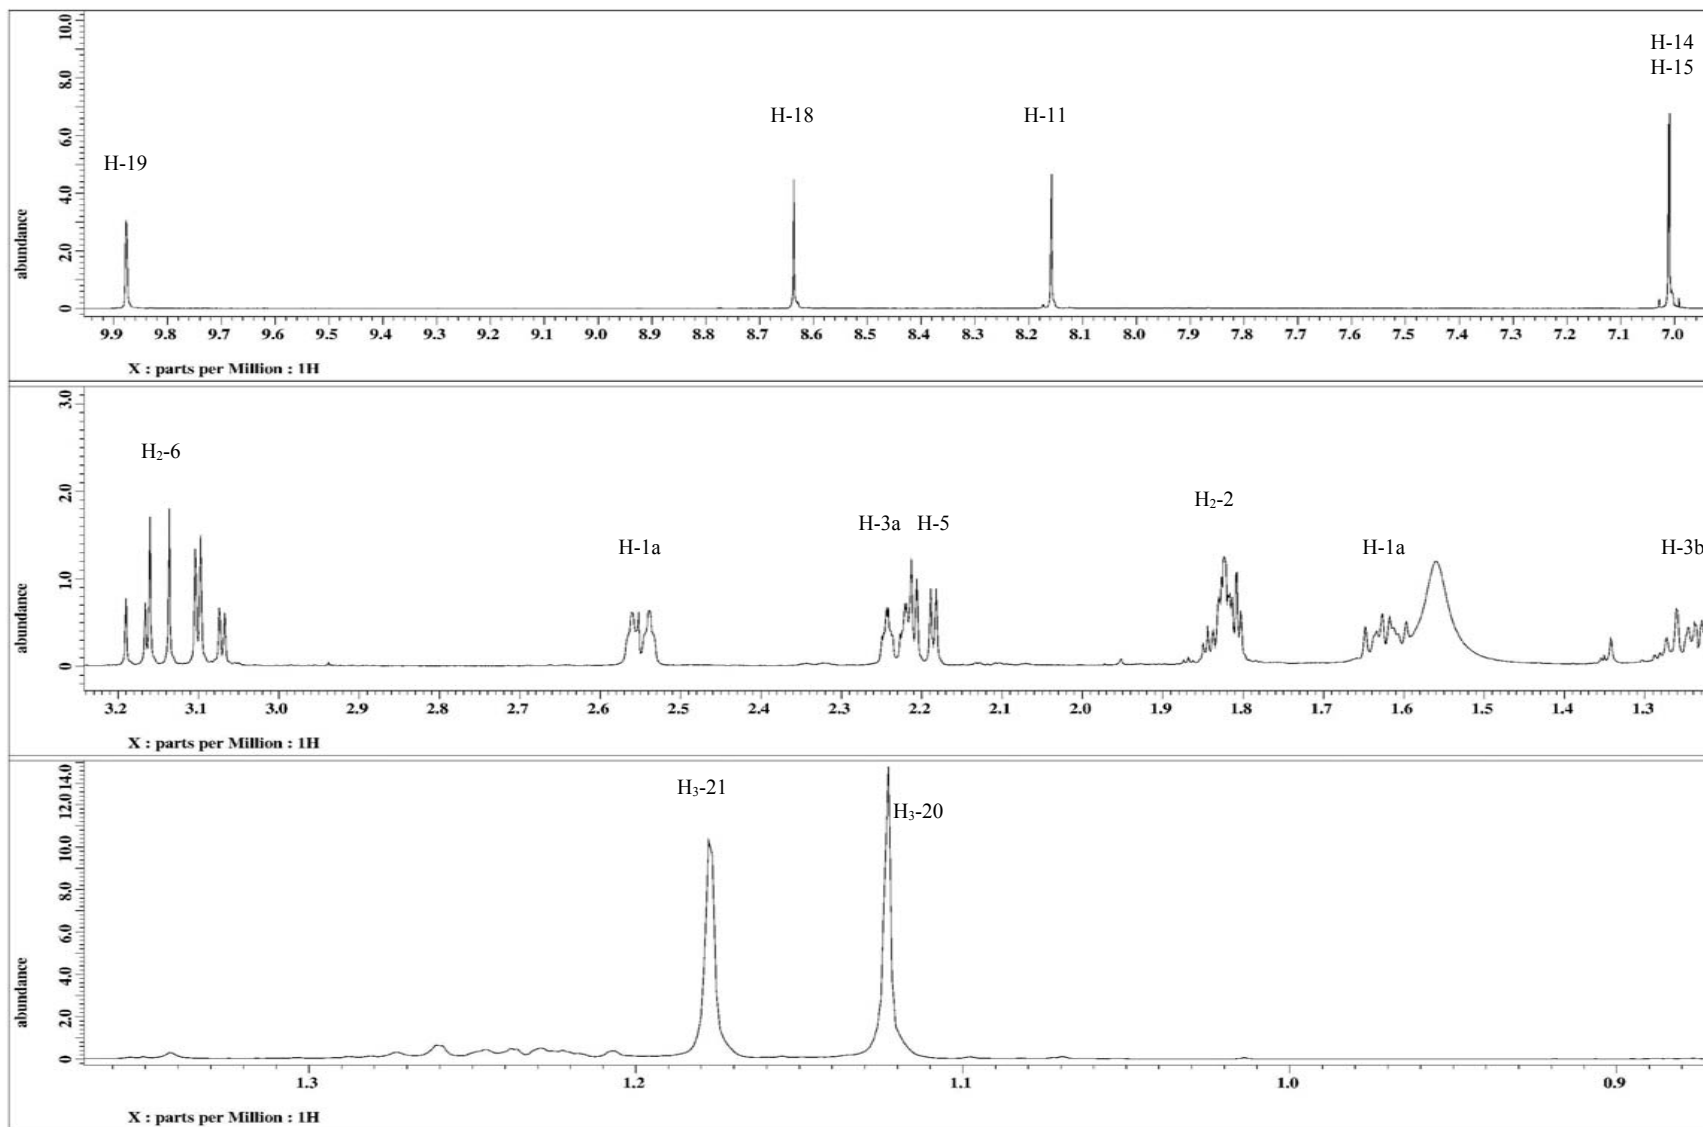

S4:  $^{13}\text{C}$  NMR spectrum of neopetrosiquinone A (**1**), 600 MHz,  $\text{CD}_2\text{Cl}_2$

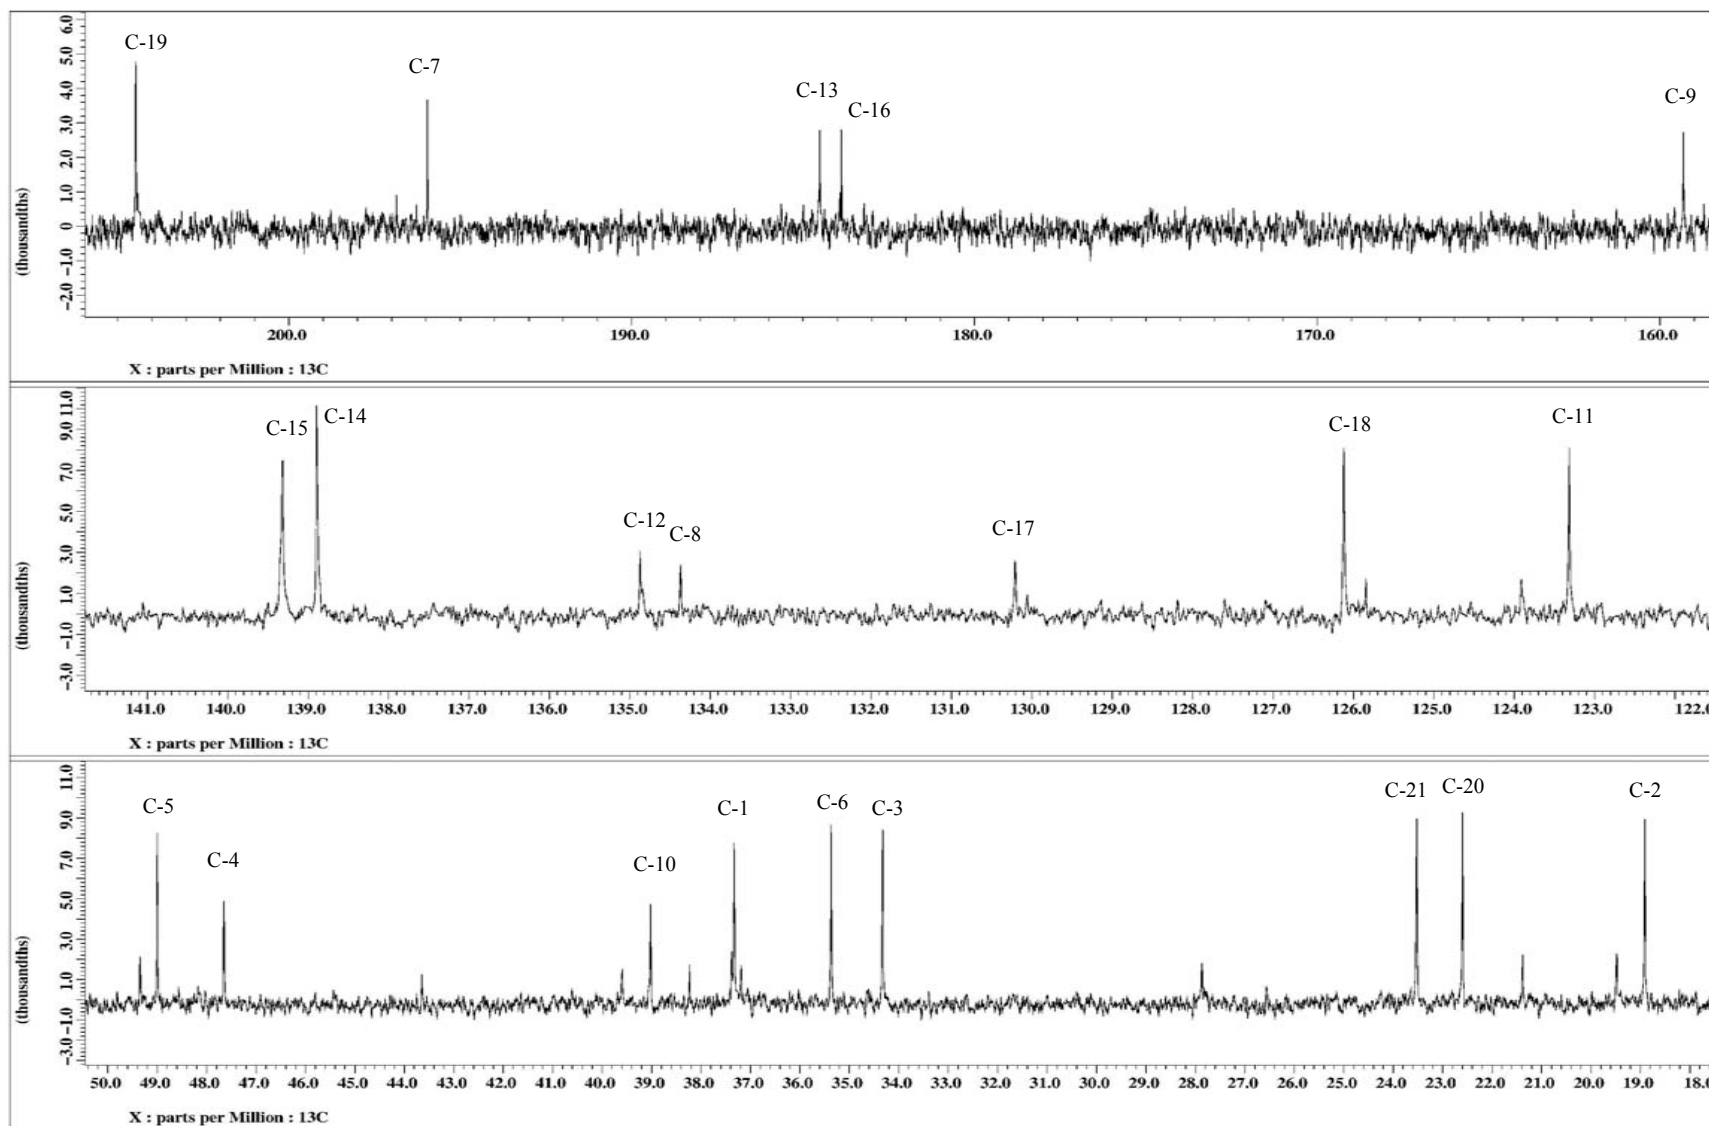

S5: edited gHSQC spectrum of neopetrosiquinone A (**1**), 600 MHz, CD<sub>2</sub>Cl<sub>2</sub>

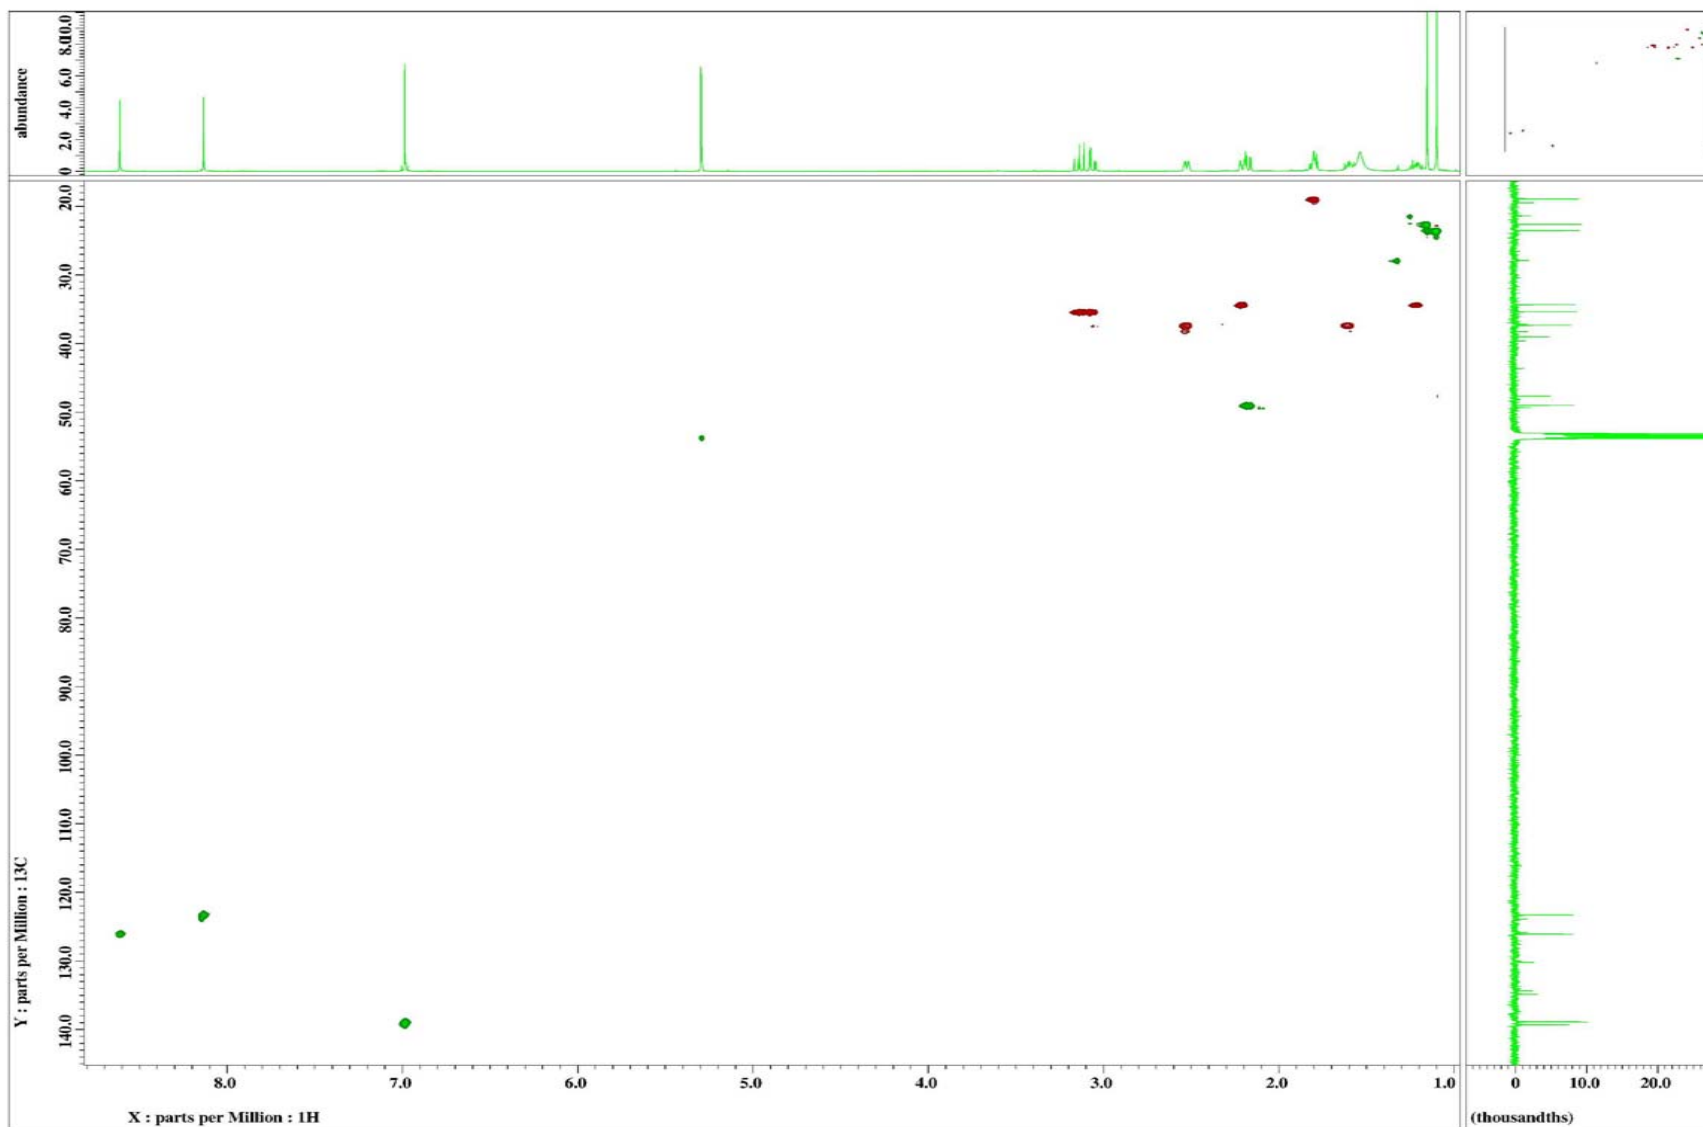

S6: Expansion of gHSQC spectrum of neopetrosiquinone A (**1**), 600 MHz, CD<sub>2</sub>Cl<sub>2</sub>

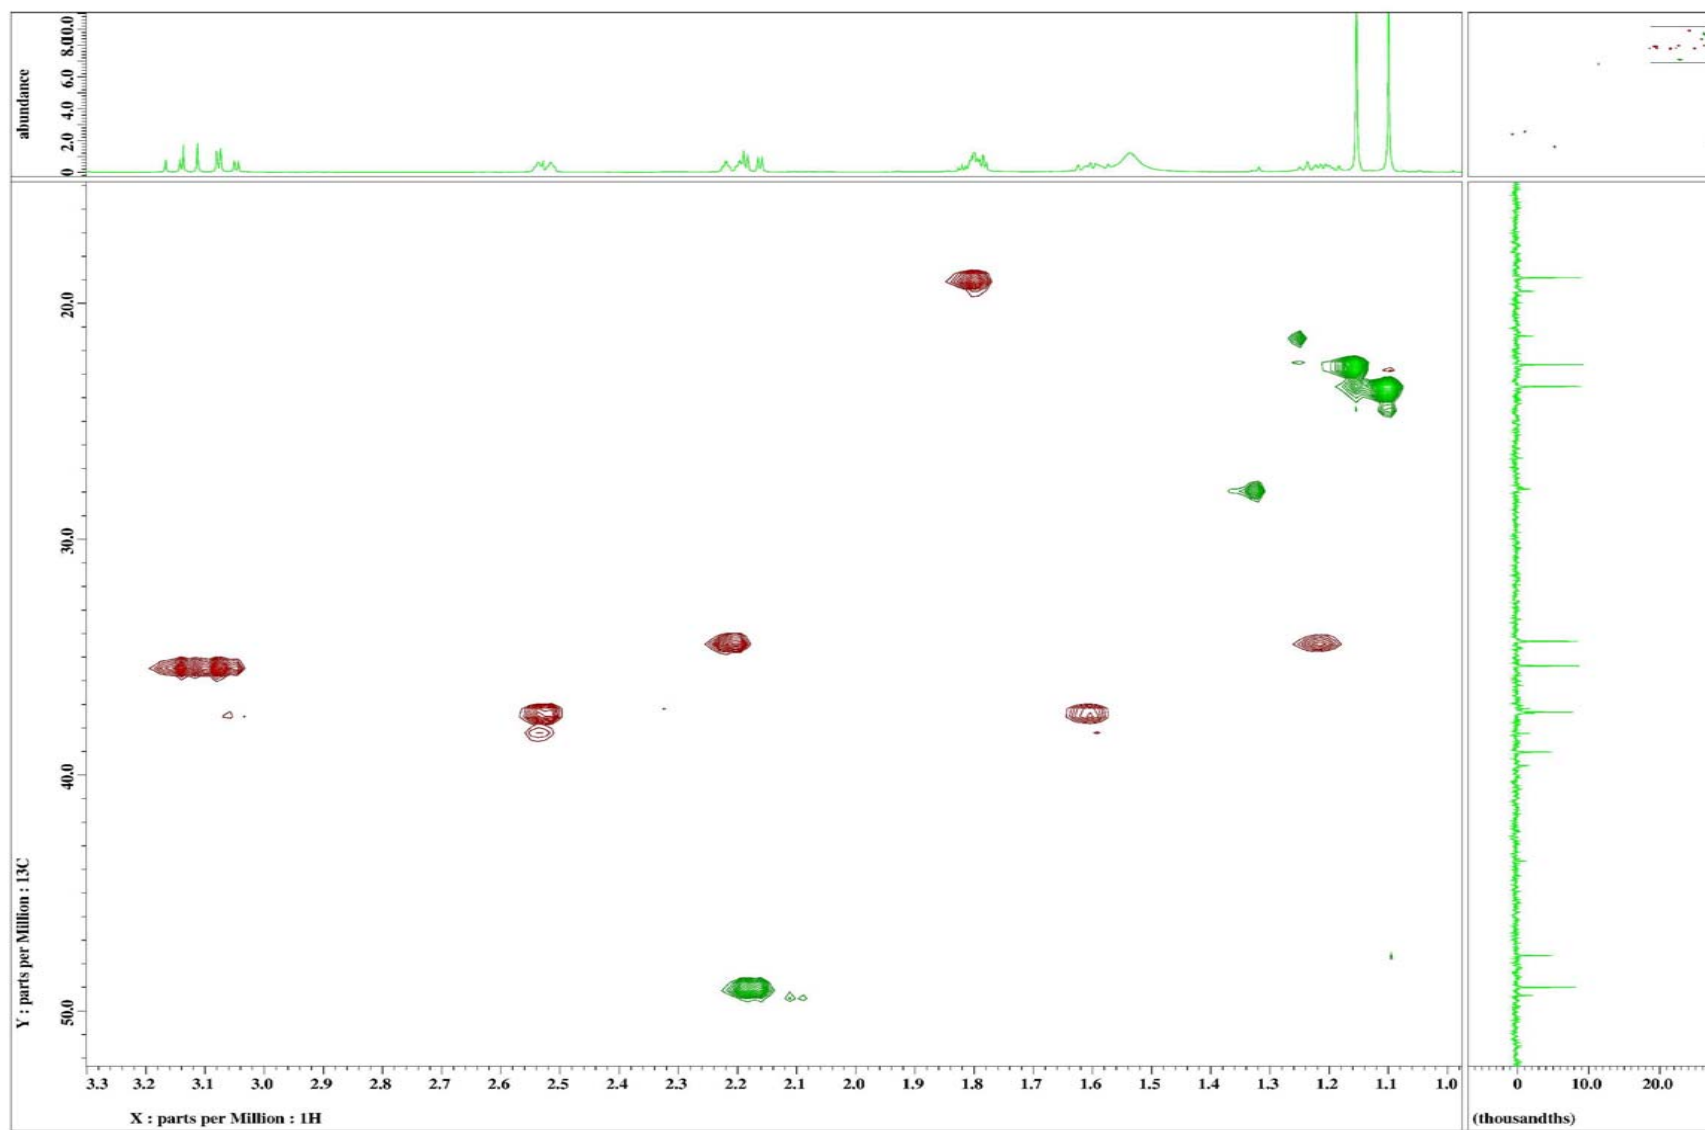

S7: gDQF-COSY spectrum of neopetrosiquinone A (1), 600 MHz, CD<sub>2</sub>Cl<sub>2</sub>

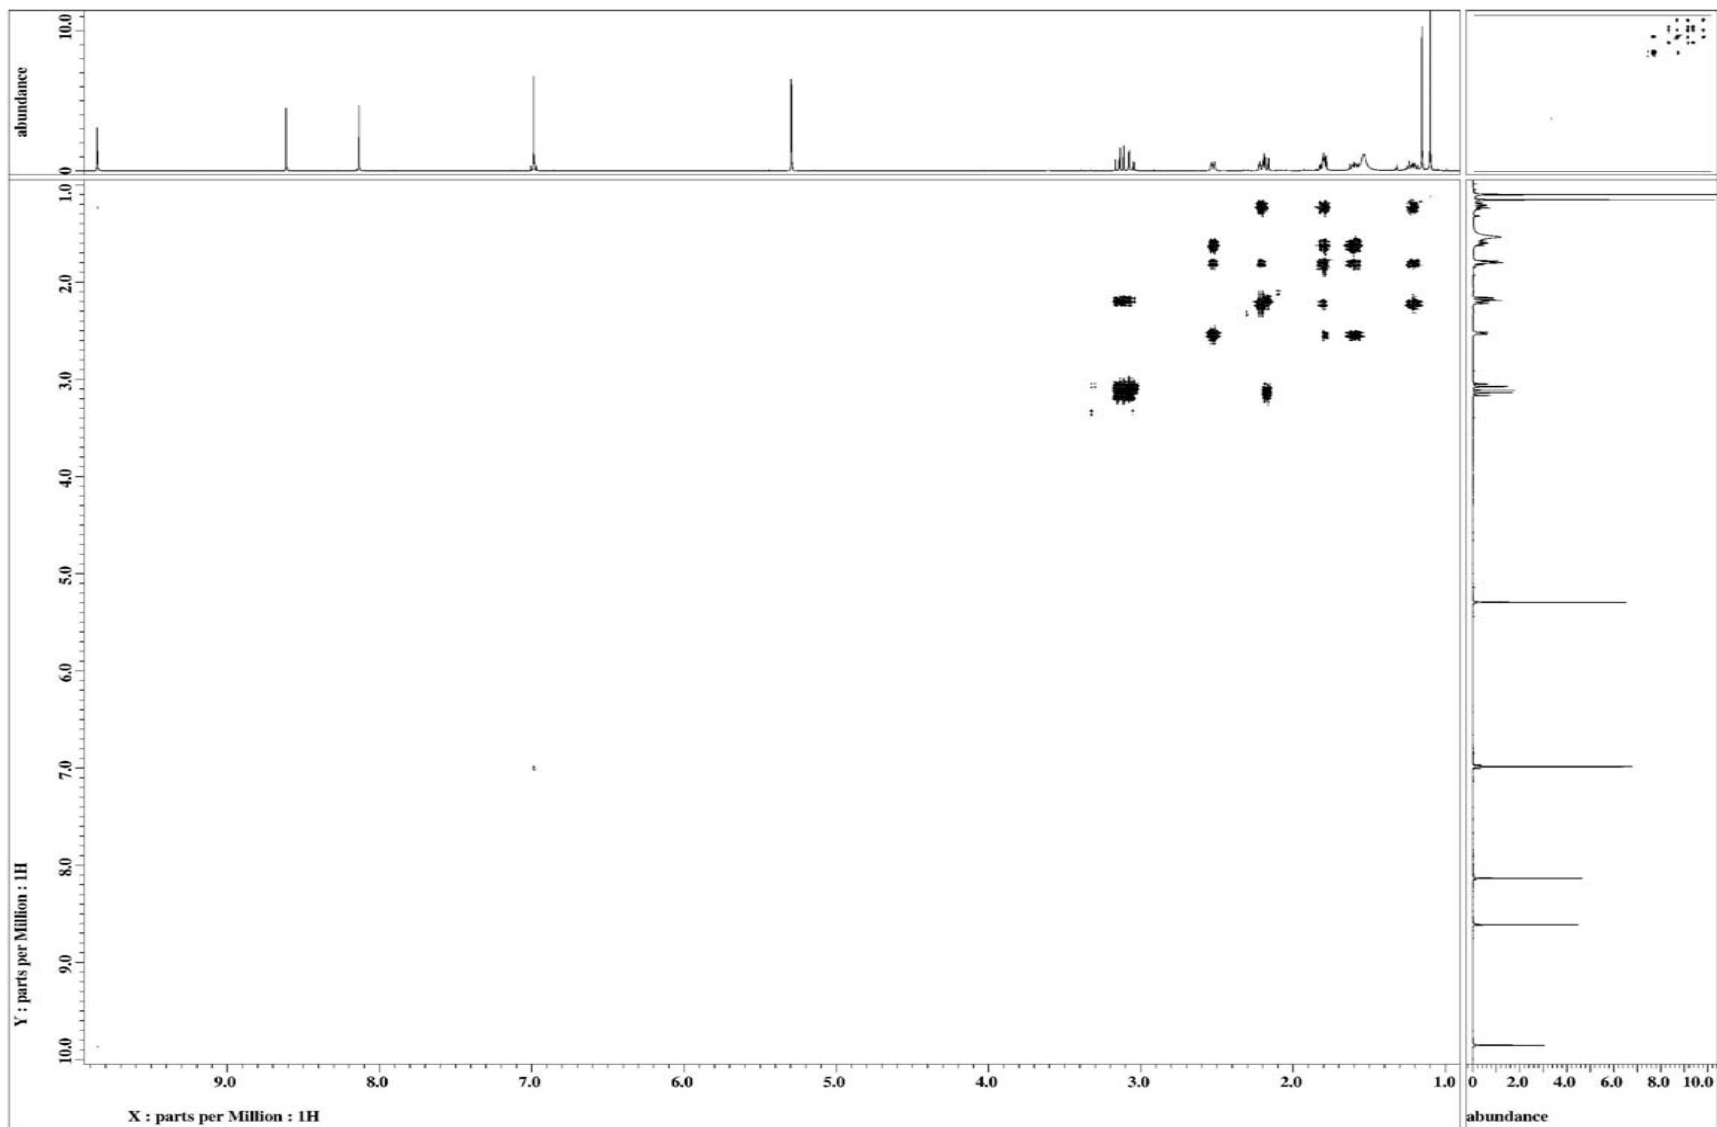



S8: Expansion of gDQF-COSY spectrum of neopetrosiquinone A (**1**), 600 MHz, CD<sub>2</sub>Cl<sub>2</sub>

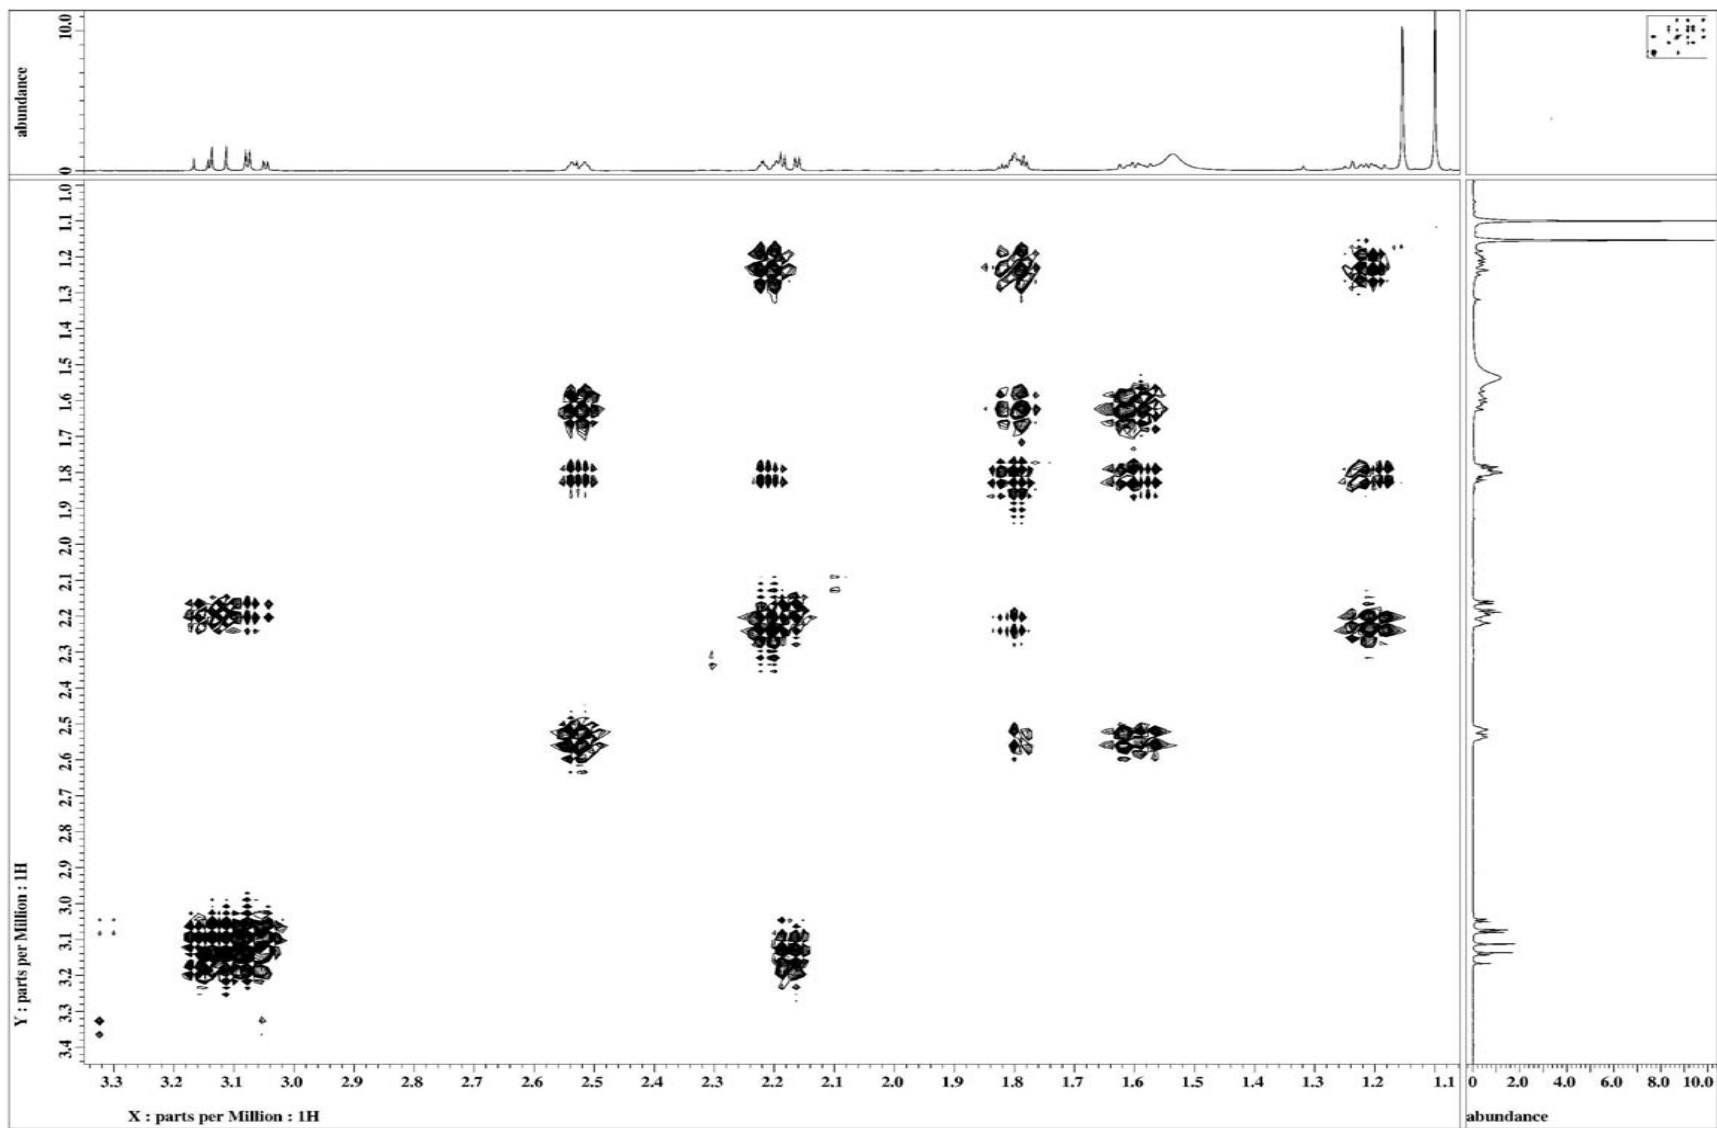

S9: gHMBC spectrum of neopetrosiquinone A (1), 600 MHz, CD<sub>2</sub>Cl<sub>2</sub>

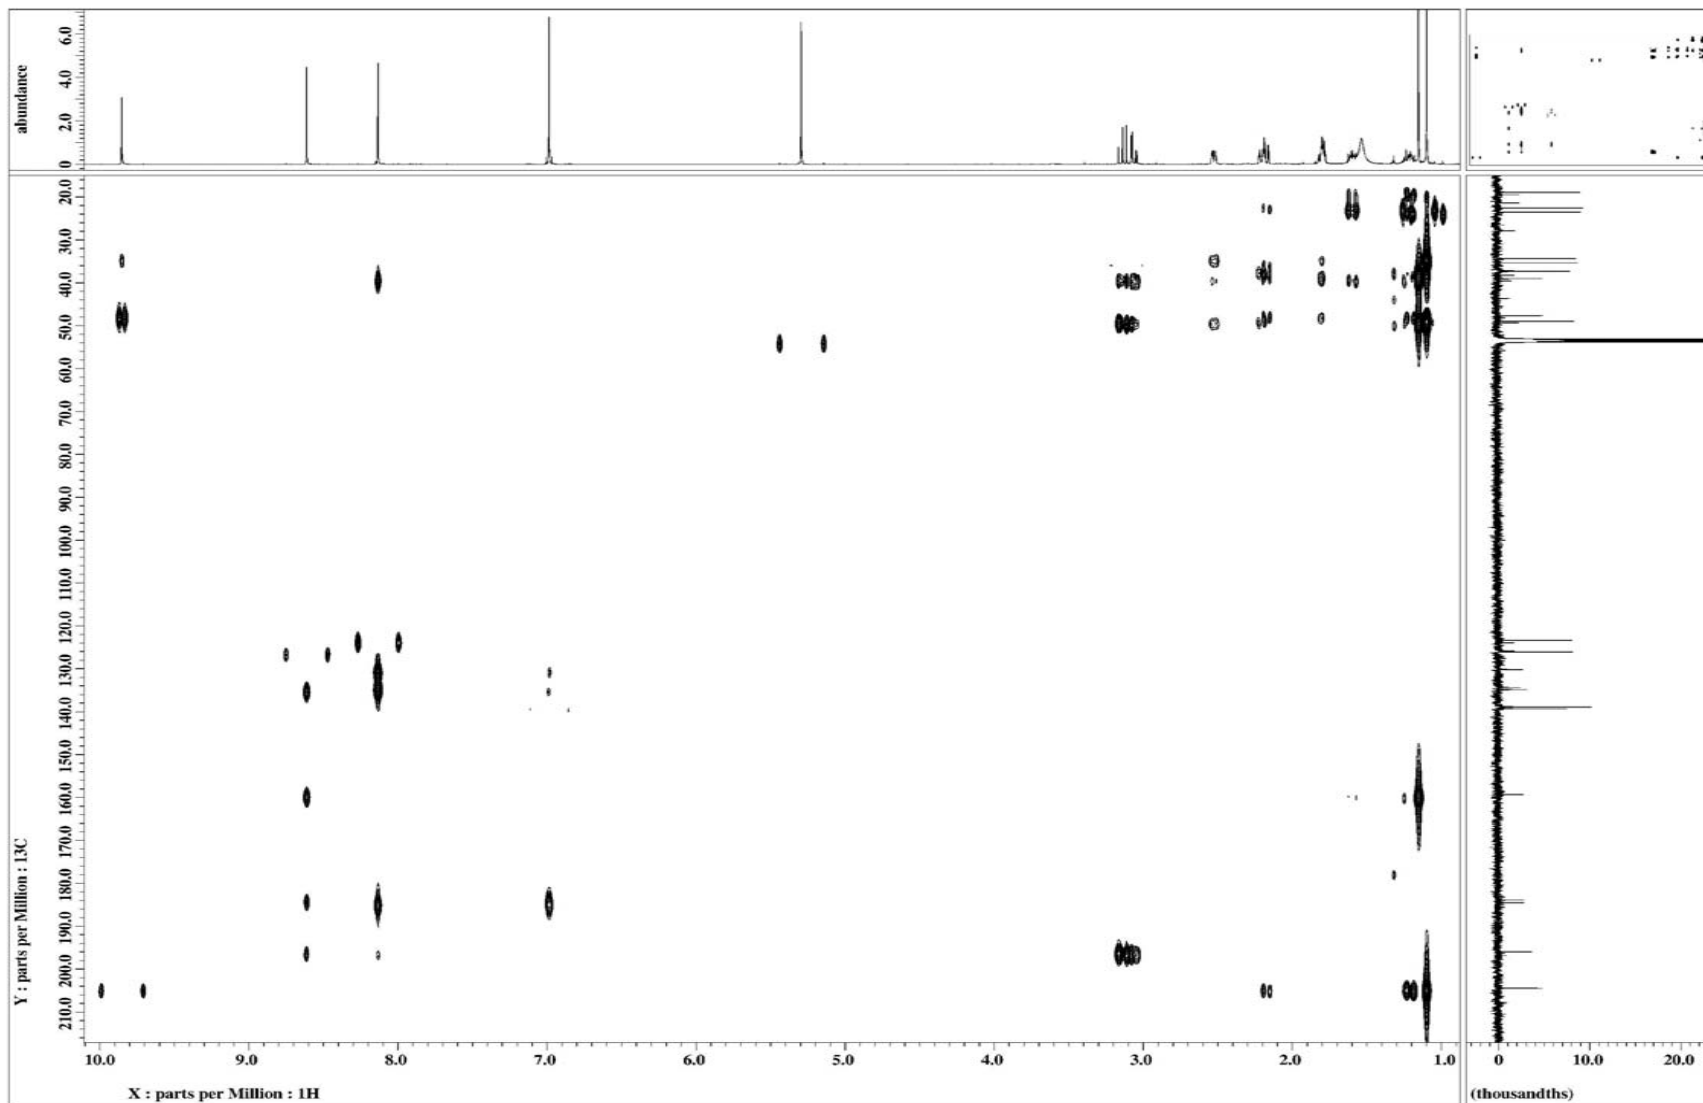

S10: NOESY spectrum of neopetrosiquinone A (1), 600 MHz, CD<sub>2</sub>Cl<sub>2</sub>

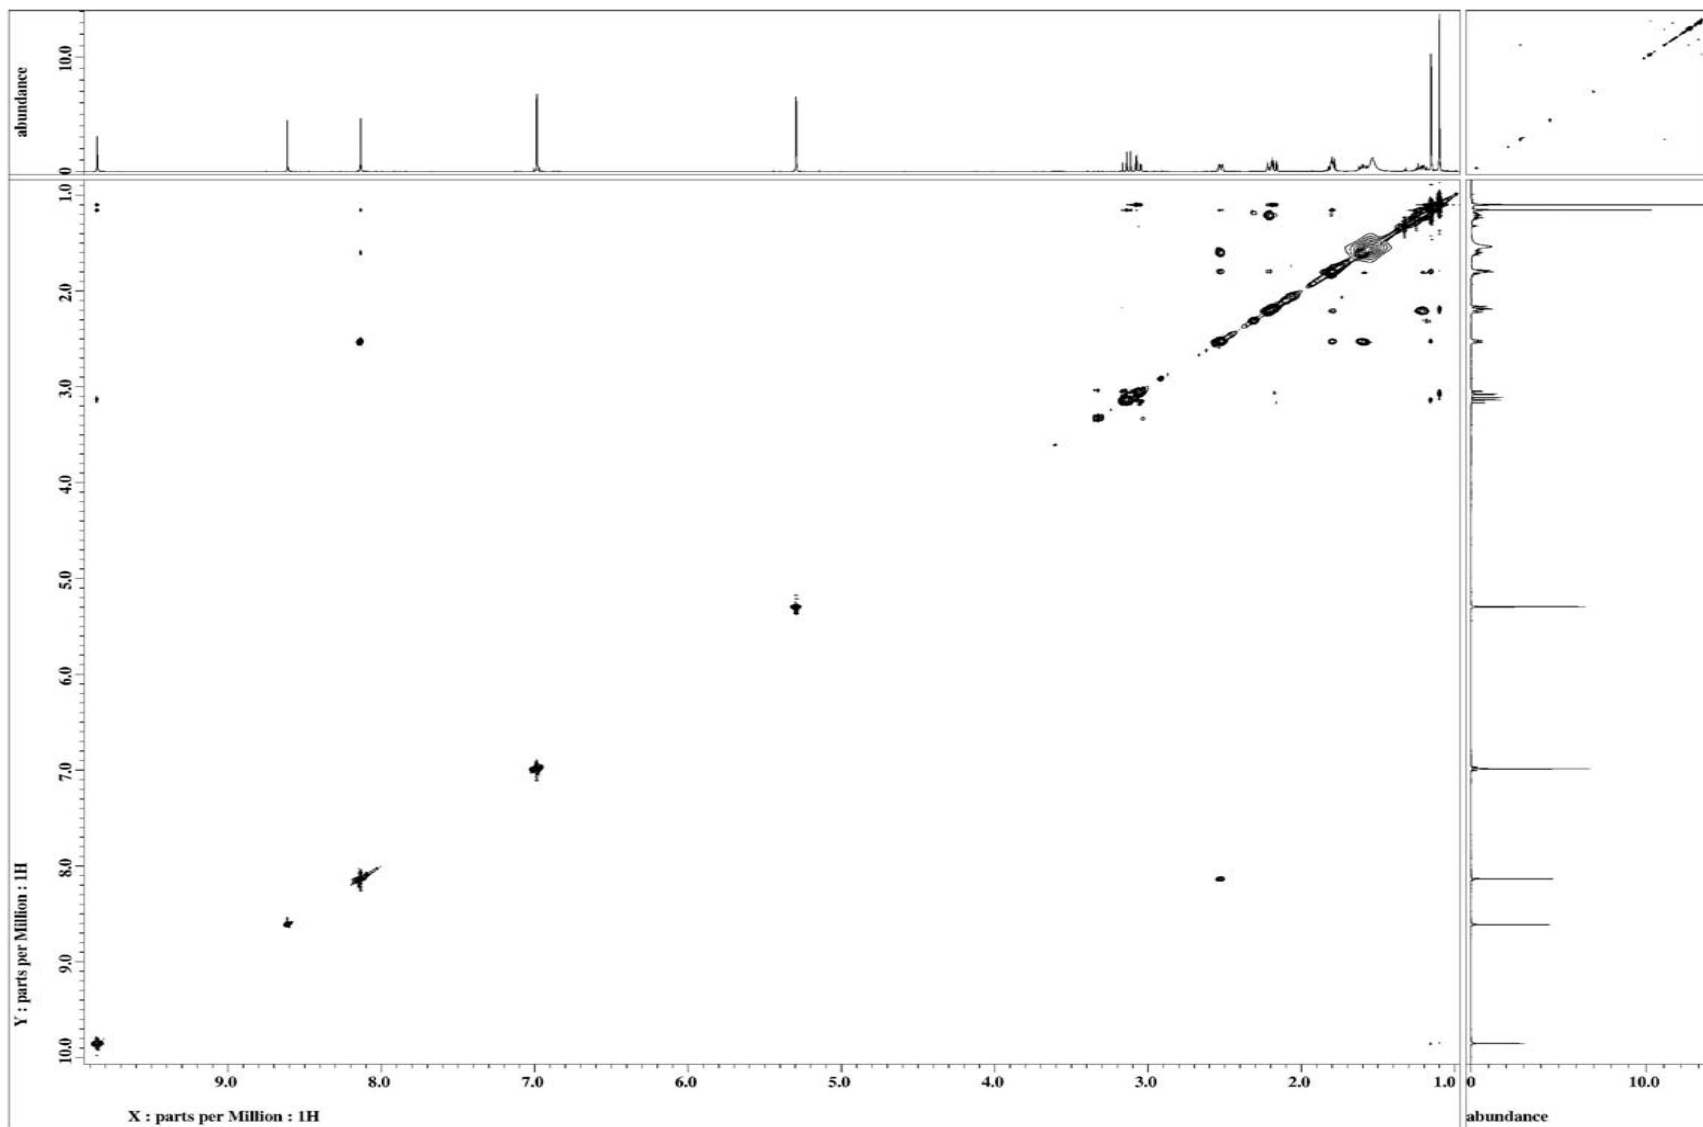

S11: TOCSY spectrum of neopetrosiquinone A (1), 600 MHz, CD<sub>2</sub>Cl<sub>2</sub>

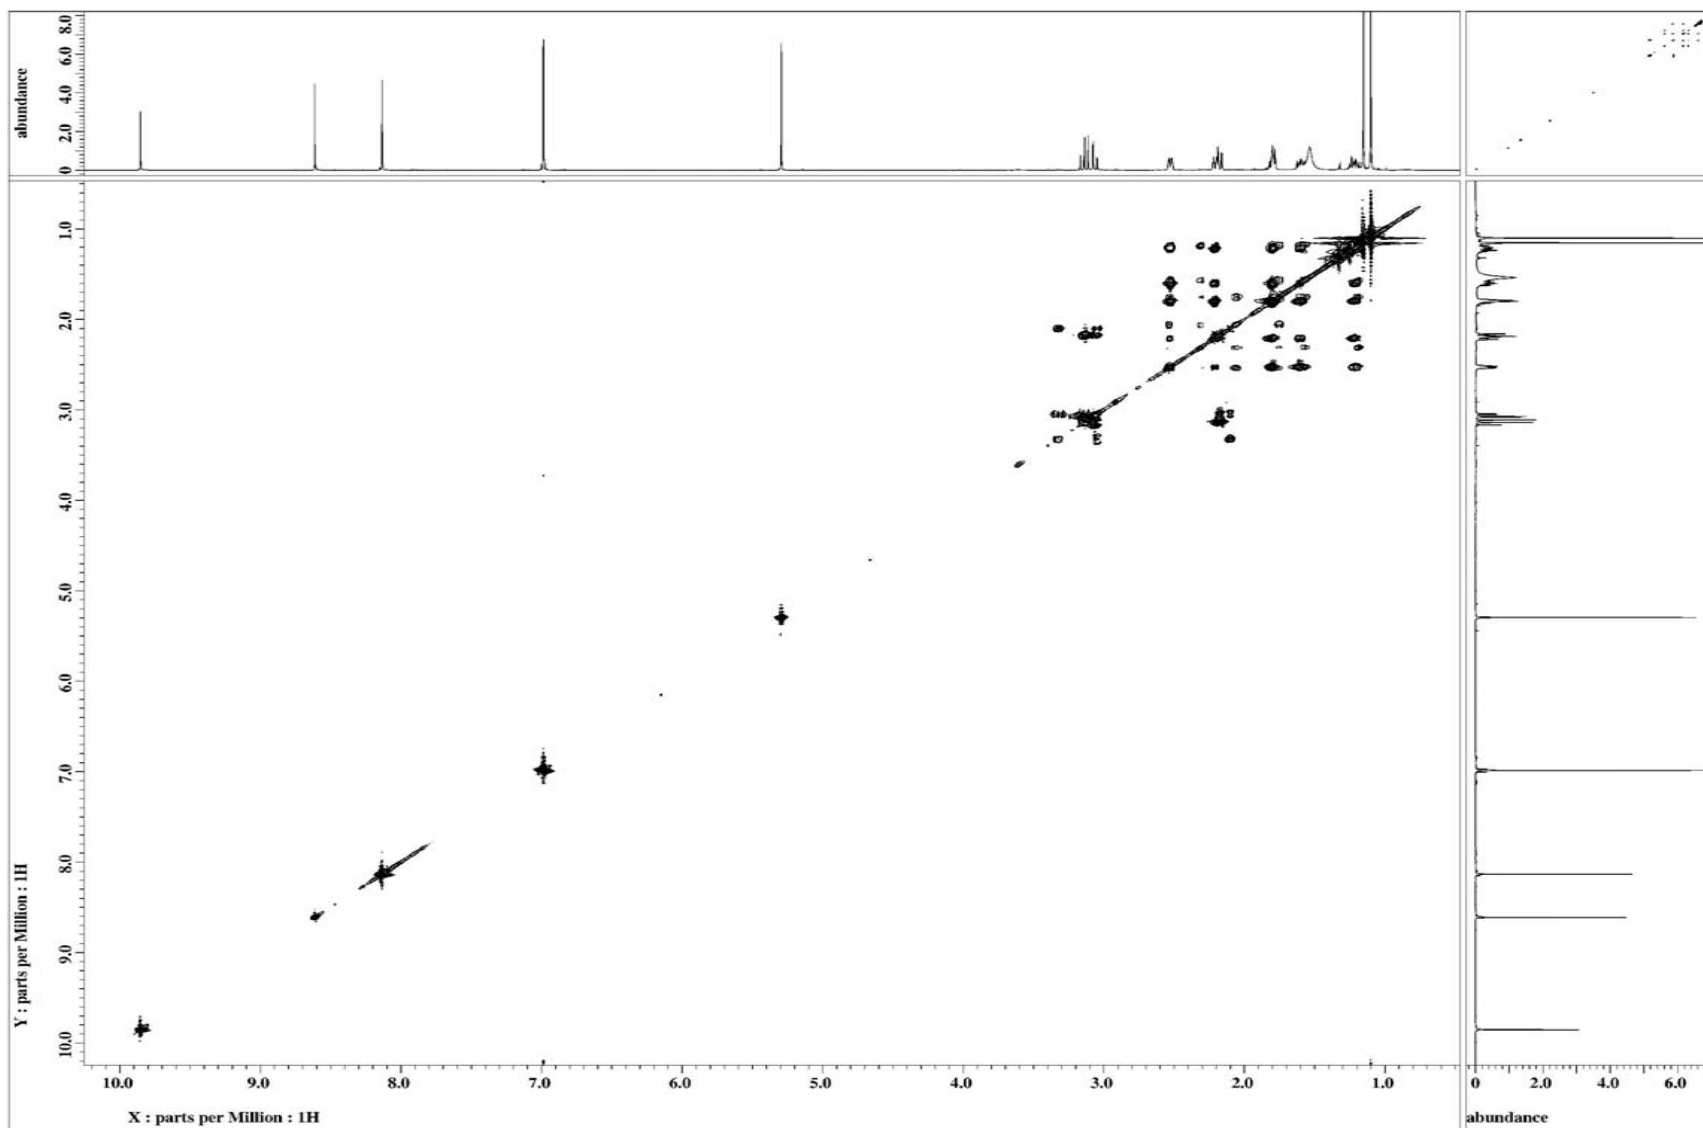

S12:  $^1\text{H}$  NMR spectrum of neopetrosiquinone A (**1**), 600 MHz,  $\text{CH}_2\text{Cl}_2:\text{CD}_3\text{OD}$  (1:1)

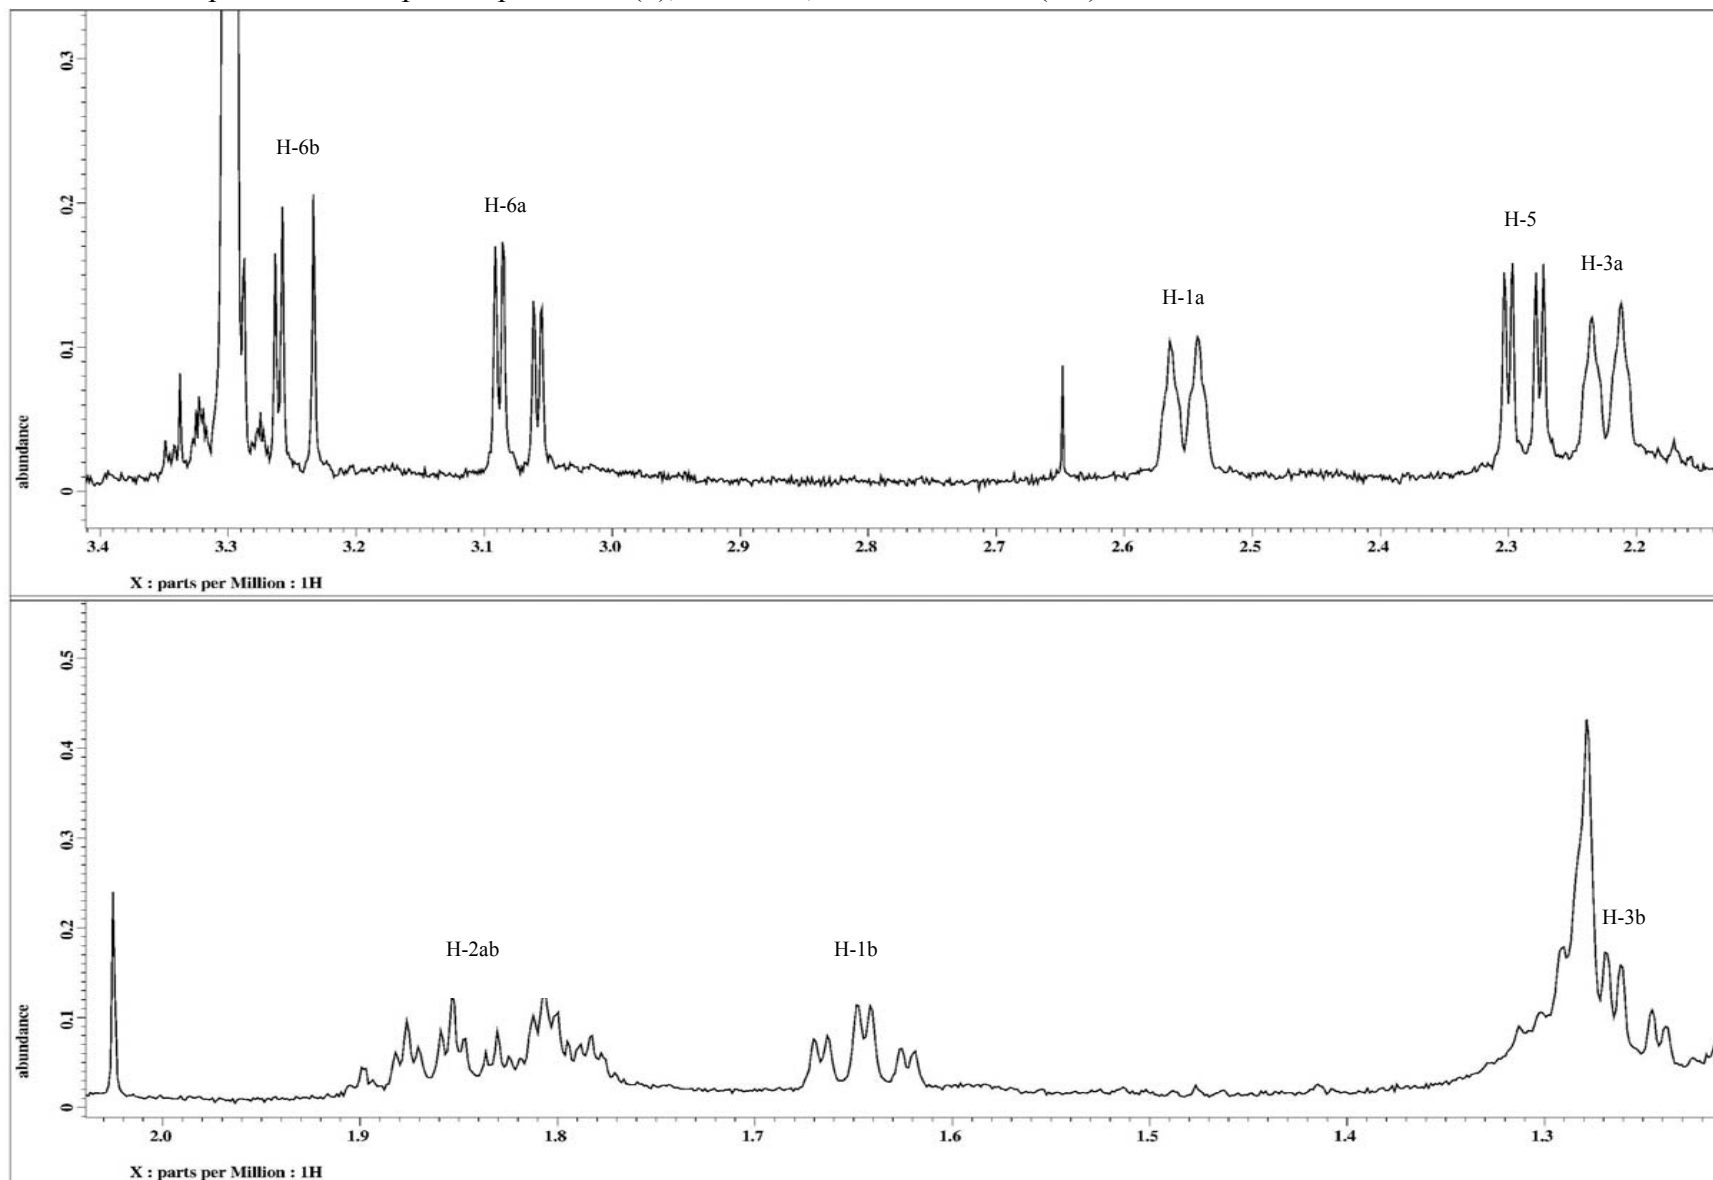

S13:  $^1\text{H}$  and  $^{13}\text{C}$  NMR data for neopetrosiquinone A (**1**),  $\text{CD}_2\text{Cl}_2$ , 600 MHz

| position |                | $\delta\text{C}$ , mult. | $\delta\text{H}$ , J (Hz)            | COSY     | HMBC <sup>a</sup> | NOESY             | TOCSY      |
|----------|----------------|--------------------------|--------------------------------------|----------|-------------------|-------------------|------------|
| 1        | A              | 37.3, CH <sub>2</sub>    | 2.55, br dt (13.1, 3.4) <sup>f</sup> | 1B, 2    | 2,5,10            | 1B, 11, 21        | 1B, 2, 3AB |
|          | B              |                          | 1.62, m                              | 1A, 2    | 2,10              | 1A                | 1A, 2, 3AB |
| 2        |                | 18.8, CH <sub>2</sub>    | 1.82, m                              | 1AB, 3AB | 4                 | 21                | 1AB, 3AB   |
| 3        | A              | 34.3, CH <sub>2</sub>    | 2.23, dt (14.4, 3.4) <sup>f</sup>    | 2, 3B    | 1,5,19            | 1B, 20            | 1B, 2, 3B  |
|          | B              |                          | 1.23, m                              | 2, 3A    | 2,4,19, 20        | 1AB, 2, 3A        | 3A         |
| 4        |                | 48.9, qC                 |                                      |          |                   |                   |            |
| 5        |                | 49.2, CH                 | 2.19, dd (14.8, 4.8)                 | 6        | 3,4,6,19,20       | 1B, 2, 20         | 6          |
| 6        | A <sup>b</sup> | 35.4, CH <sub>2</sub>    | 3.14, dd (17.9, 3.4)                 | 5        | 4,7,8,10          | 20                | 5          |
|          | B <sup>c</sup> |                          | 3.05, dd (17.9, 14.4)                |          |                   | 19, 21            |            |
| 7        |                | 195.0, qC                |                                      |          |                   |                   |            |
| 8        |                | 134.4, qC                |                                      |          |                   |                   |            |
| 9        |                | 159.3, qC                |                                      |          |                   |                   |            |
| 10       |                | 39.0, qC                 |                                      |          |                   |                   |            |
| 11       |                | 123.7, CH                | 8.16, s                              |          | 7,8,10,12, 13     | 1AB, 21           |            |
| 12       |                | 134.9, qC <sup>d</sup>   |                                      |          |                   |                   |            |
| 13       |                | 184.5, qC                |                                      |          |                   |                   |            |
| 14       |                | 138.8, CH <sup>e</sup>   | 6.99, d (10.3) <sup>e</sup>          |          | 12, 13, 16, 17    |                   |            |
| 15       |                | 139.3, CH <sup>e</sup>   | 6.98, d (10.3) <sup>e</sup>          |          | 12, 13, 16, 17    |                   |            |
| 16       |                | 183.9, qC                |                                      |          |                   |                   |            |
| 17       |                | 130.2, qC <sup>d</sup>   |                                      |          |                   |                   |            |
| 18       |                | 126.7, CH                | 8.64, s                              |          | 7,9,16, 17        |                   |            |
| 19       |                | 204.5, CH                | 9.88, s                              |          | 3,4, 5            | 1B, 2, 6B, 20, 21 |            |
| 20       |                | 22.5, CH <sub>3</sub>    | 1.12, s                              |          | 3,4,19            | 5, 6A, 19         |            |
| 21       |                | 23.5, CH <sub>3</sub>    | 1.18, s                              |          | 1,5,9             | 1A, 2, 6B, 11, 19 |            |

<sup>a</sup>HMBC correlations, optimized for 8 Hz, are from proton(s) stated to the indicated carbon; <sup>b</sup>Equatorial proton; <sup>c</sup>Axial proton; <sup>d</sup>Assignments may be interchanged; <sup>e</sup>AB spin system, assignments may be interchanged; <sup>f</sup>Coupling constants were defined for H-1a and H-3a from  $^1\text{H}$  NMR spectrum performed in a 1:1 mixture of  $\text{CD}_2\text{Cl}_2$ :  $\text{CD}_3\text{OD}$ .

S14: Structure of neopetrosiquinone A (1) with chemical shifts on structure

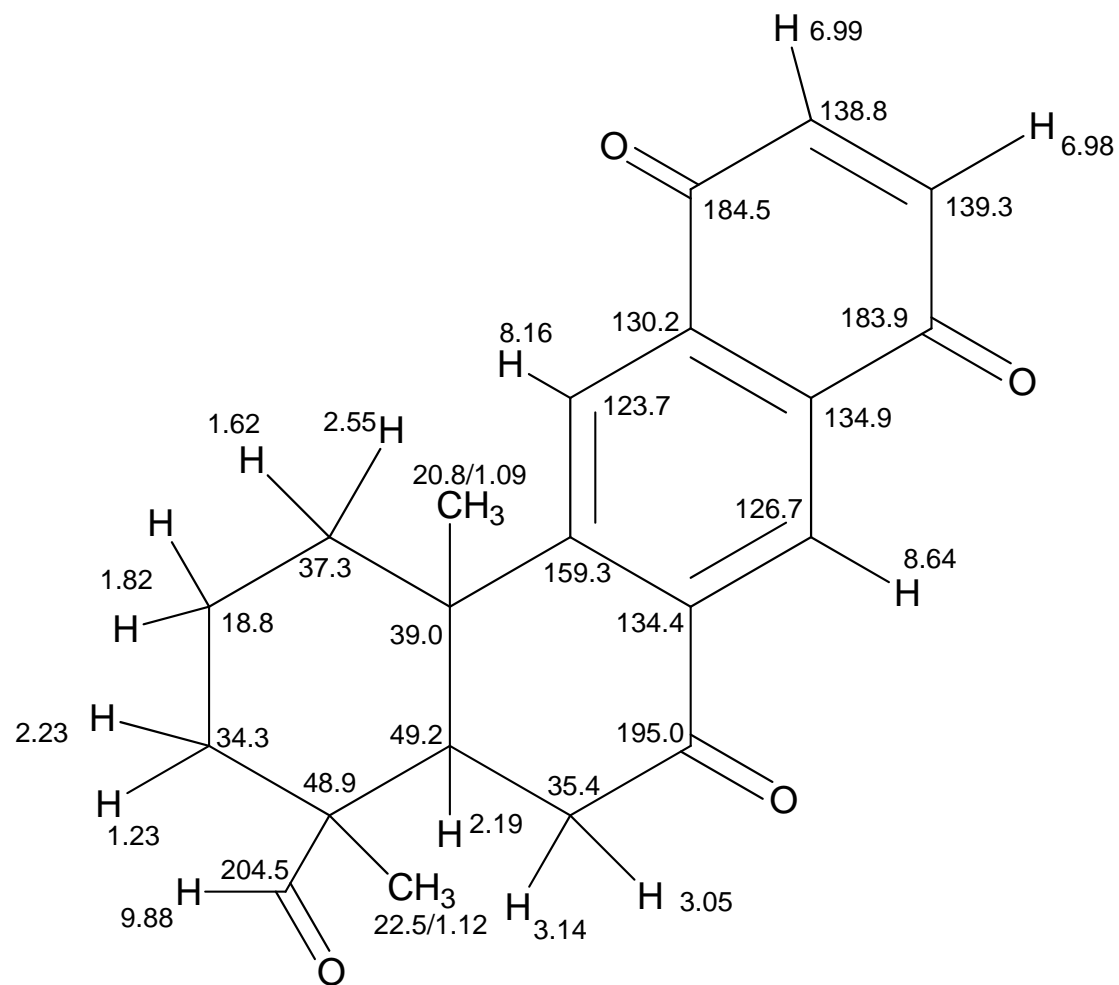

S15:  $^1\text{H}$  NMR spectrum of neopetrosiquinone B (2), 600 MHz,  $\text{CDCl}_3$

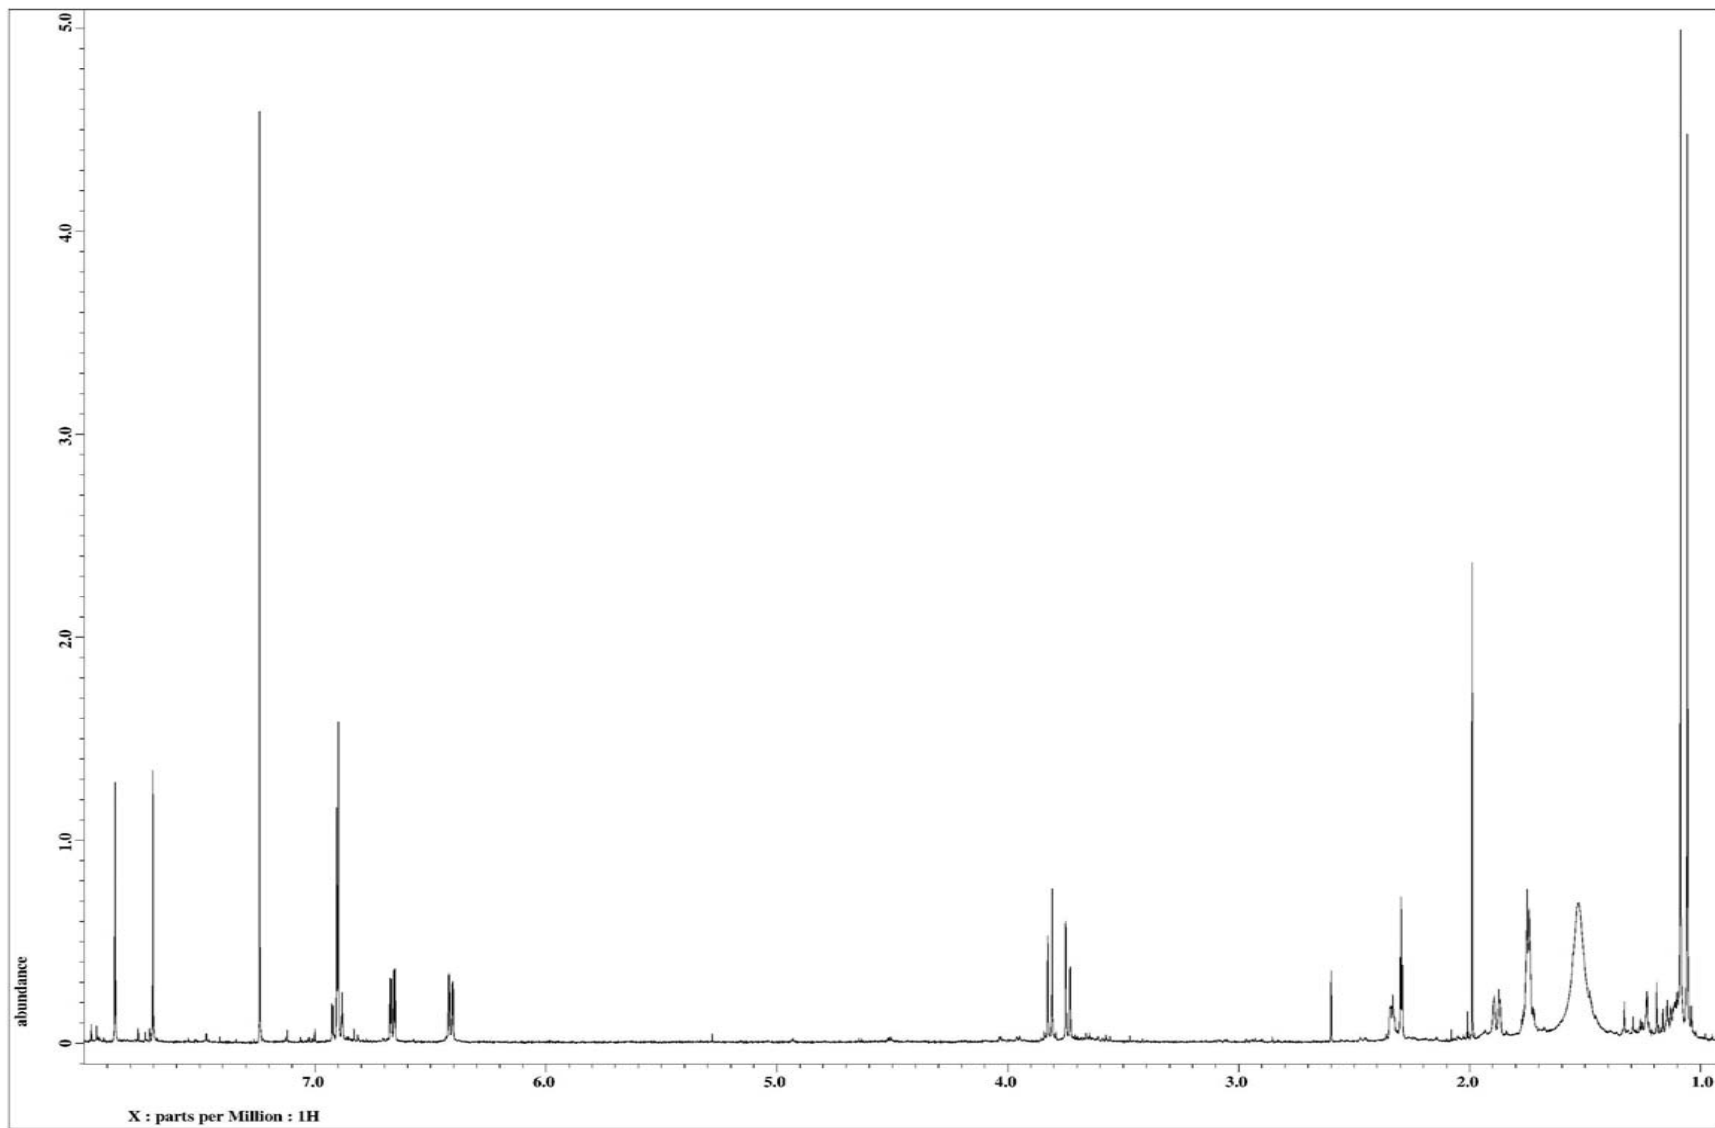



S16: Expansion of  $^1\text{H}$  NMR spectrum of neopetrosiquinone B (**2**), 600 MHz,  $\text{CDCl}_3$

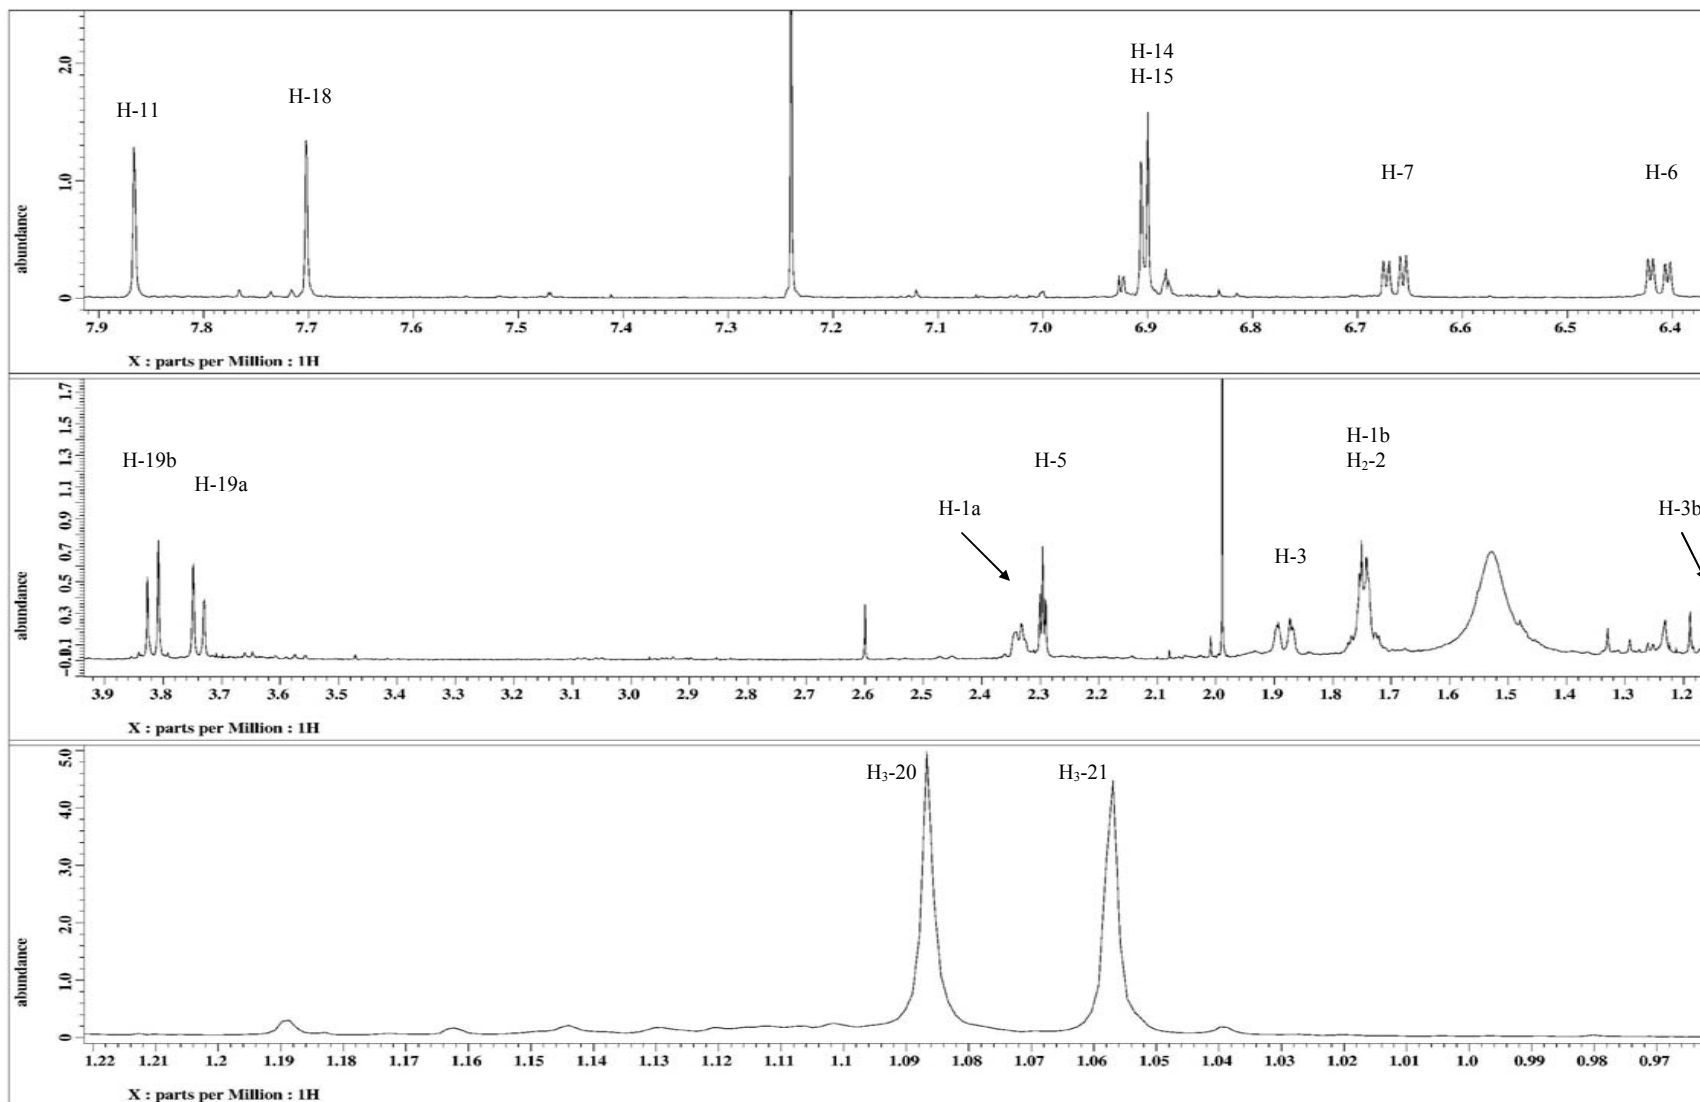

S17:  $^{13}\text{C}$  NMR spectrum of neopetrosiquinone B (**2**), 150.1 MHz,  $\text{CDCl}_3$

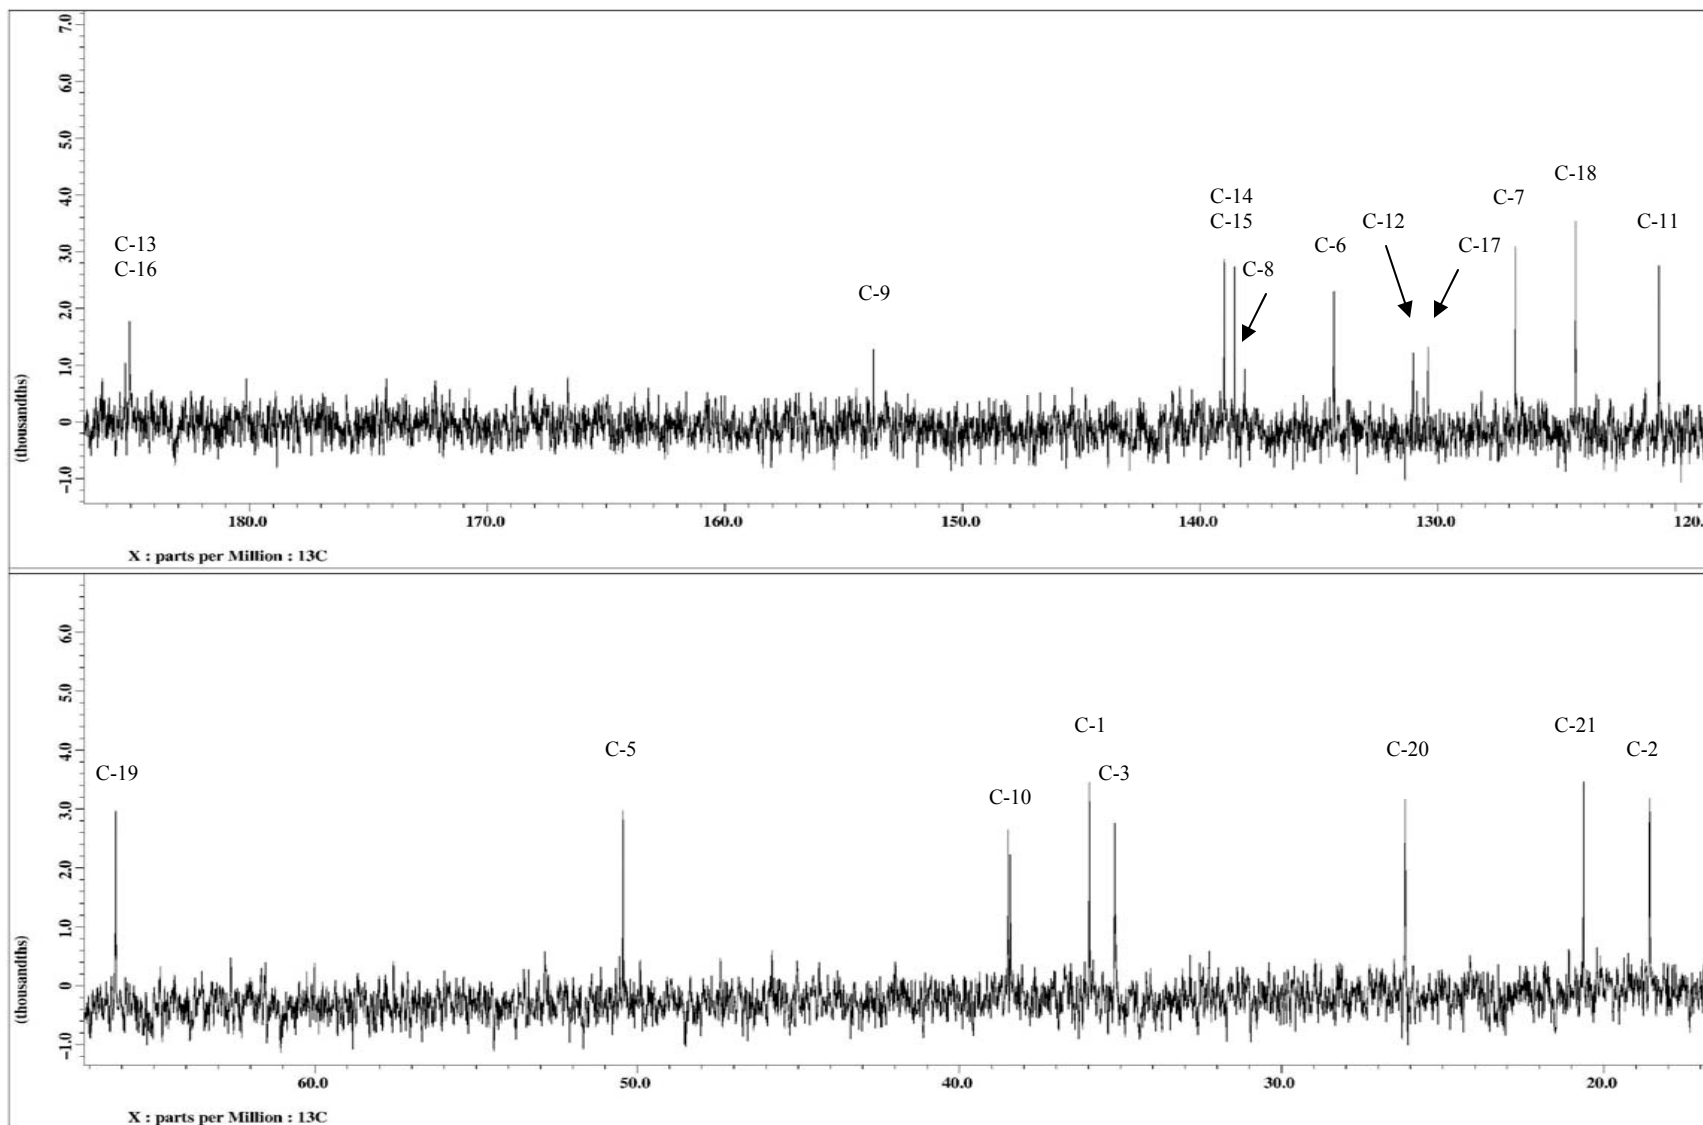

S18: edited gHSQC spectrum of neopetrosiquinone B (**2**), 600 MHz, CDCl<sub>3</sub>

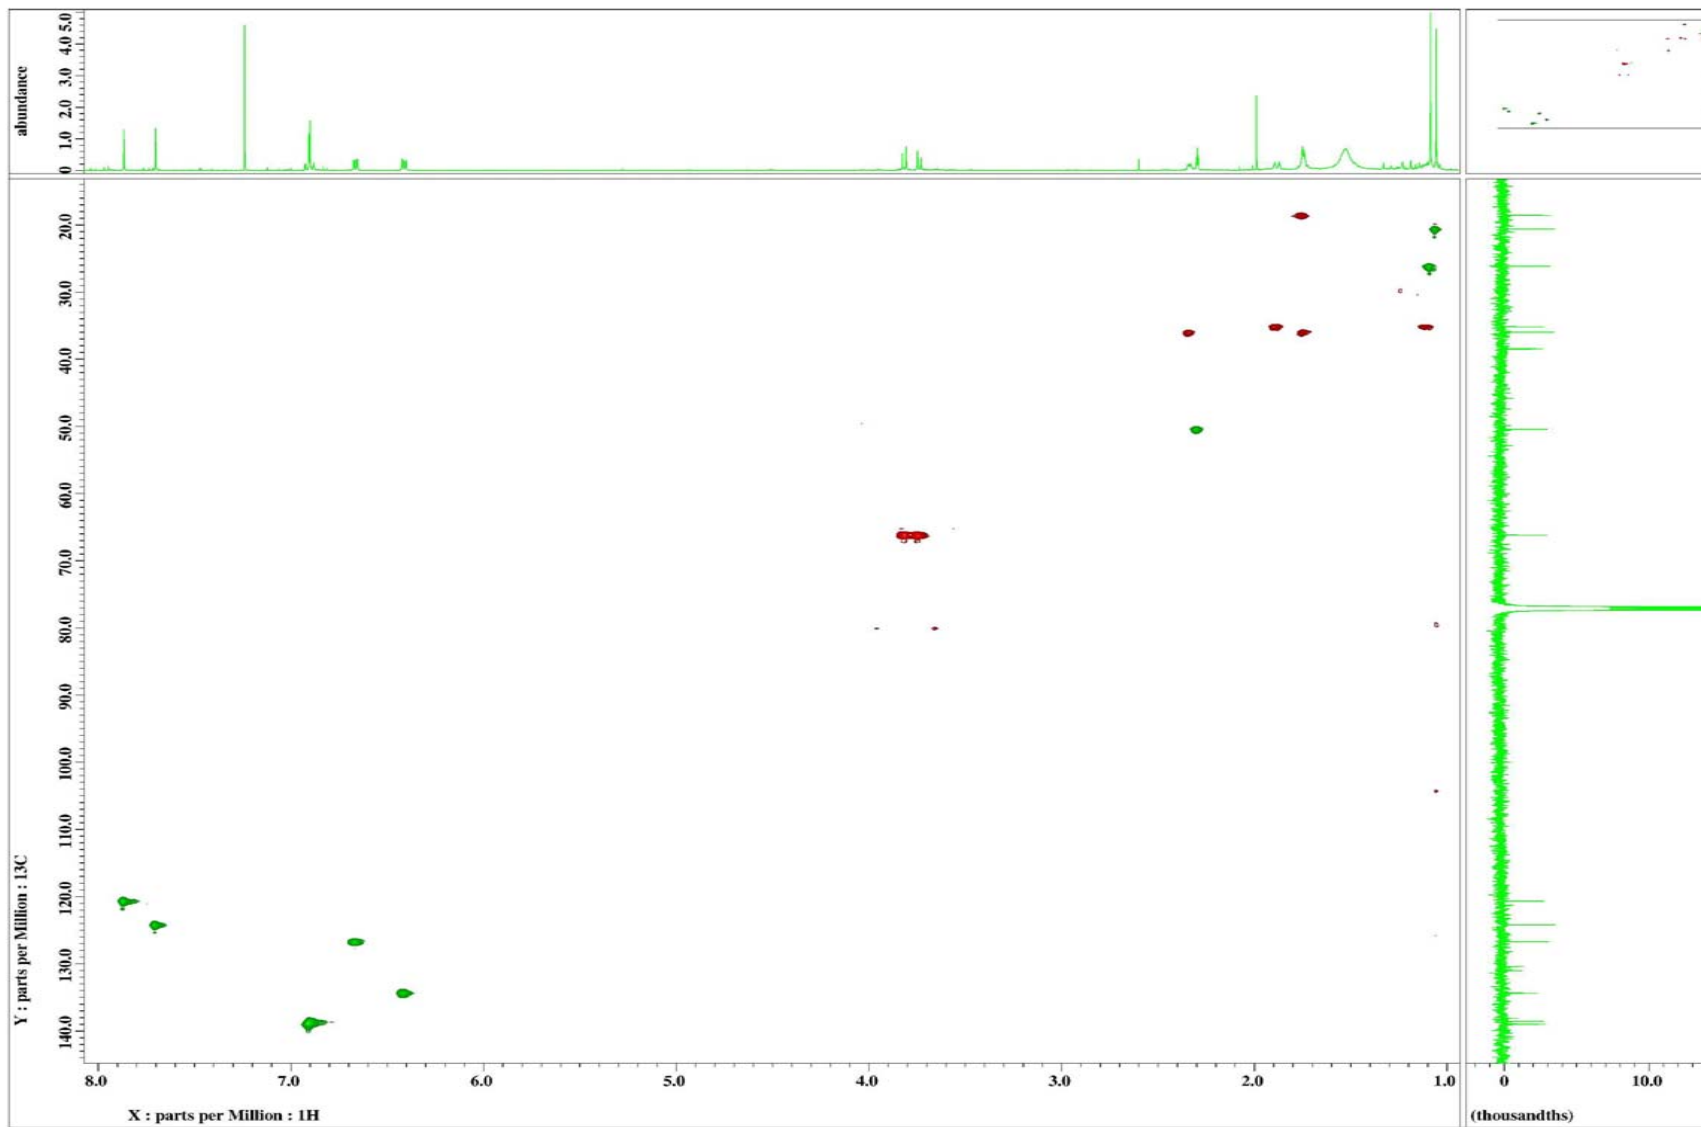

S19: Expansion of gHSQC spectrum of neopetrosiquinone B (2), 600 MHz, CD<sub>2</sub>Cl<sub>2</sub>

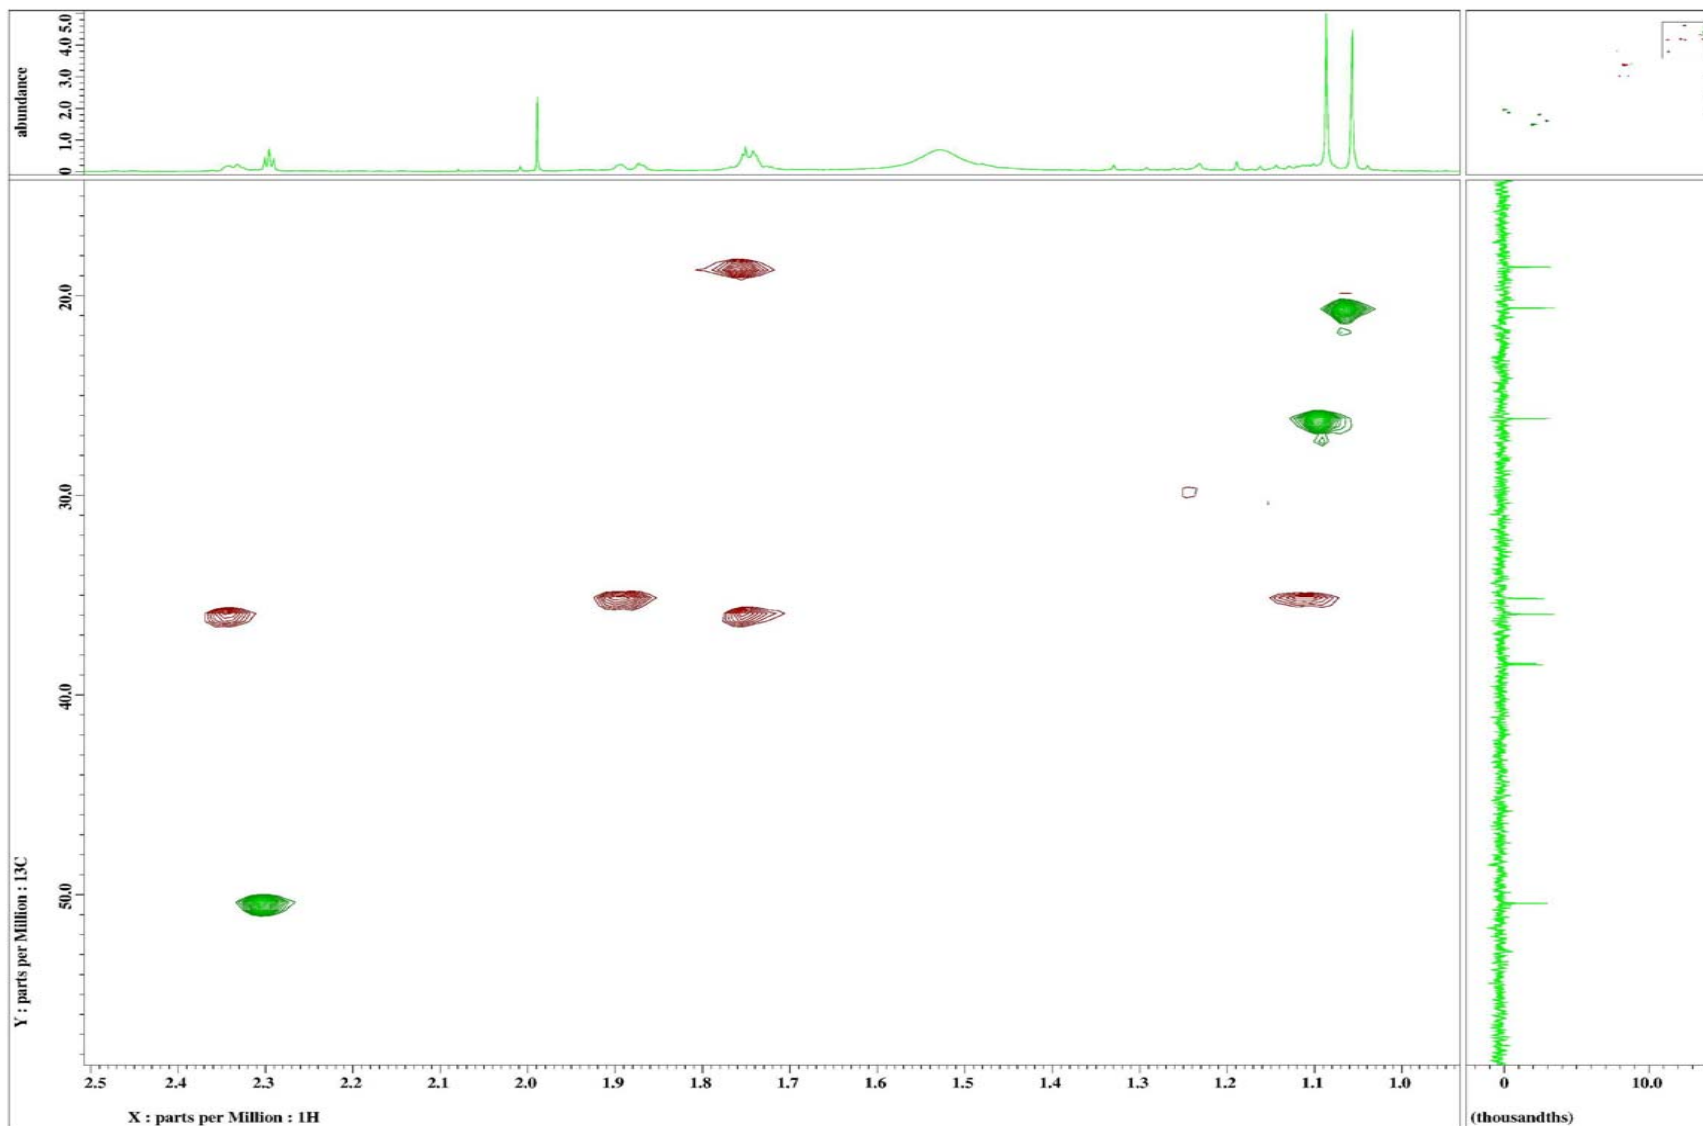

S20: gDQF-COSY spectrum of neopetrosiquinone B (2), 600 MHz, CDCl<sub>3</sub>

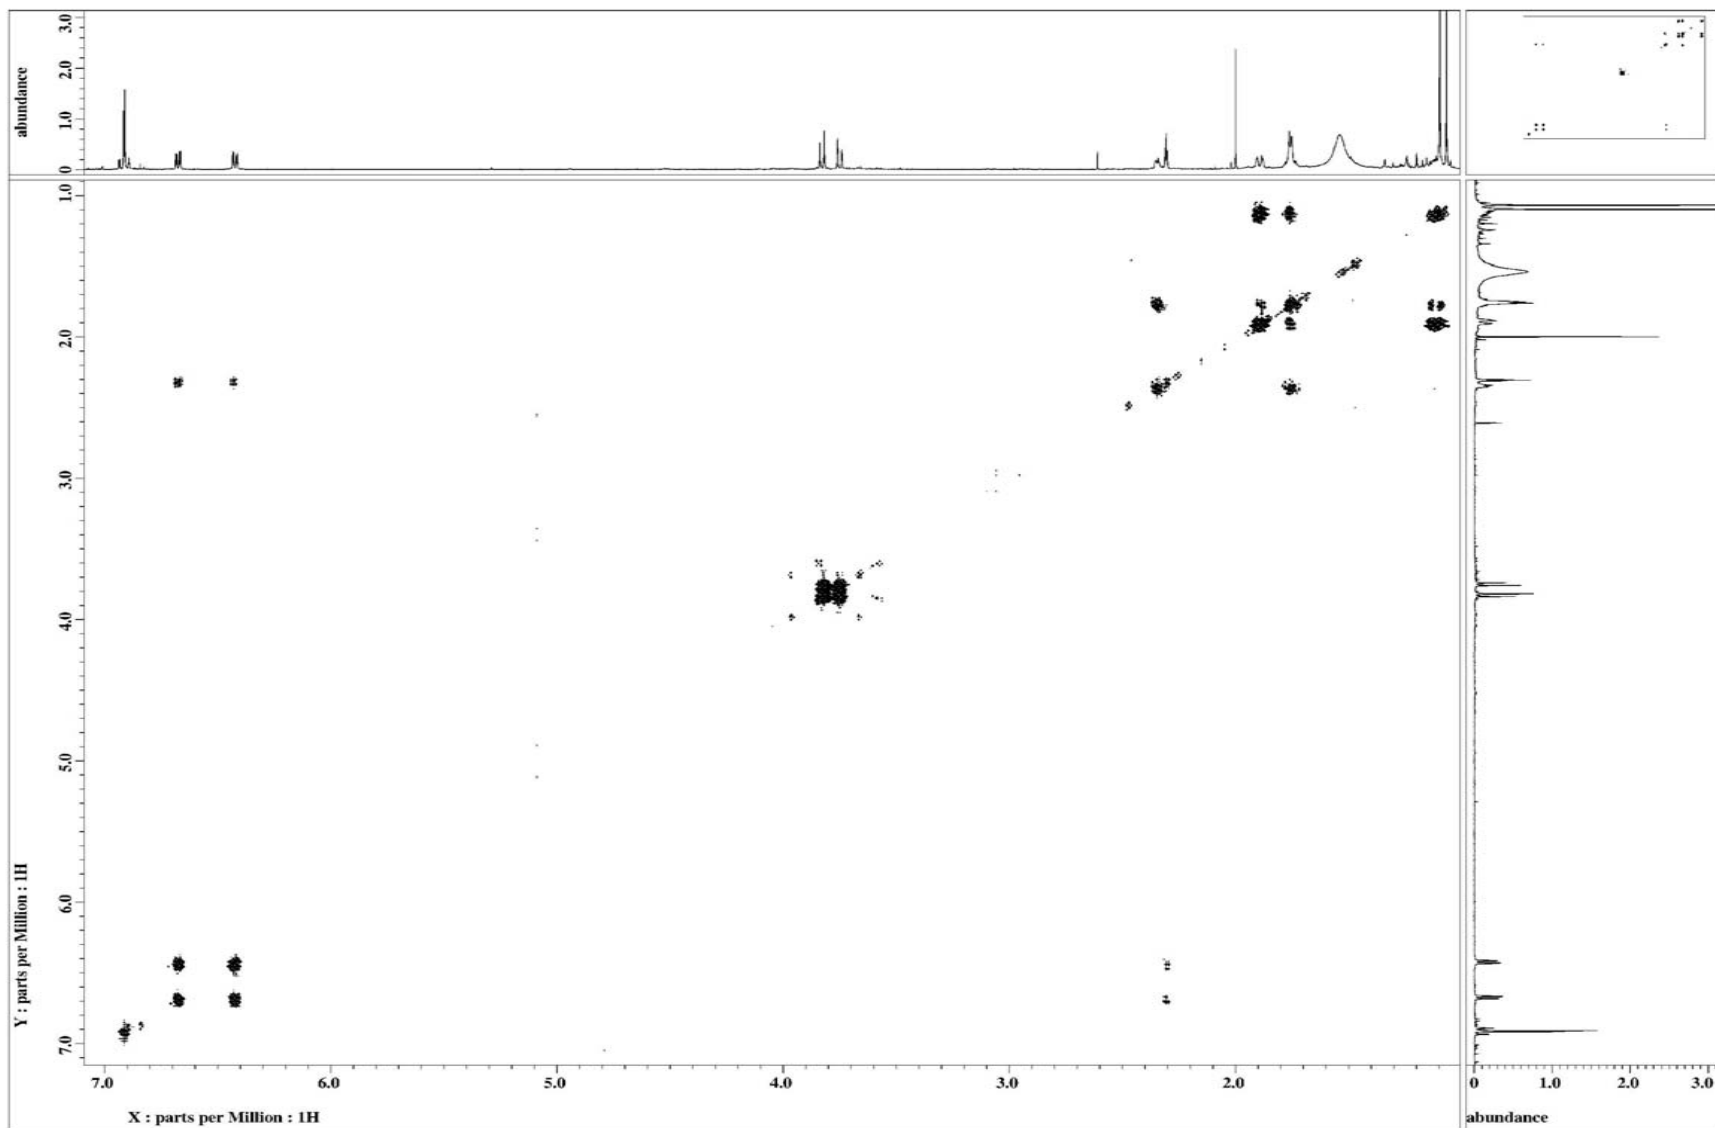

S21: Expansion of gDQF-COSY spectrum of neopetrosiquinone B (**2**), 600 MHz, CD<sub>2</sub>Cl<sub>2</sub>

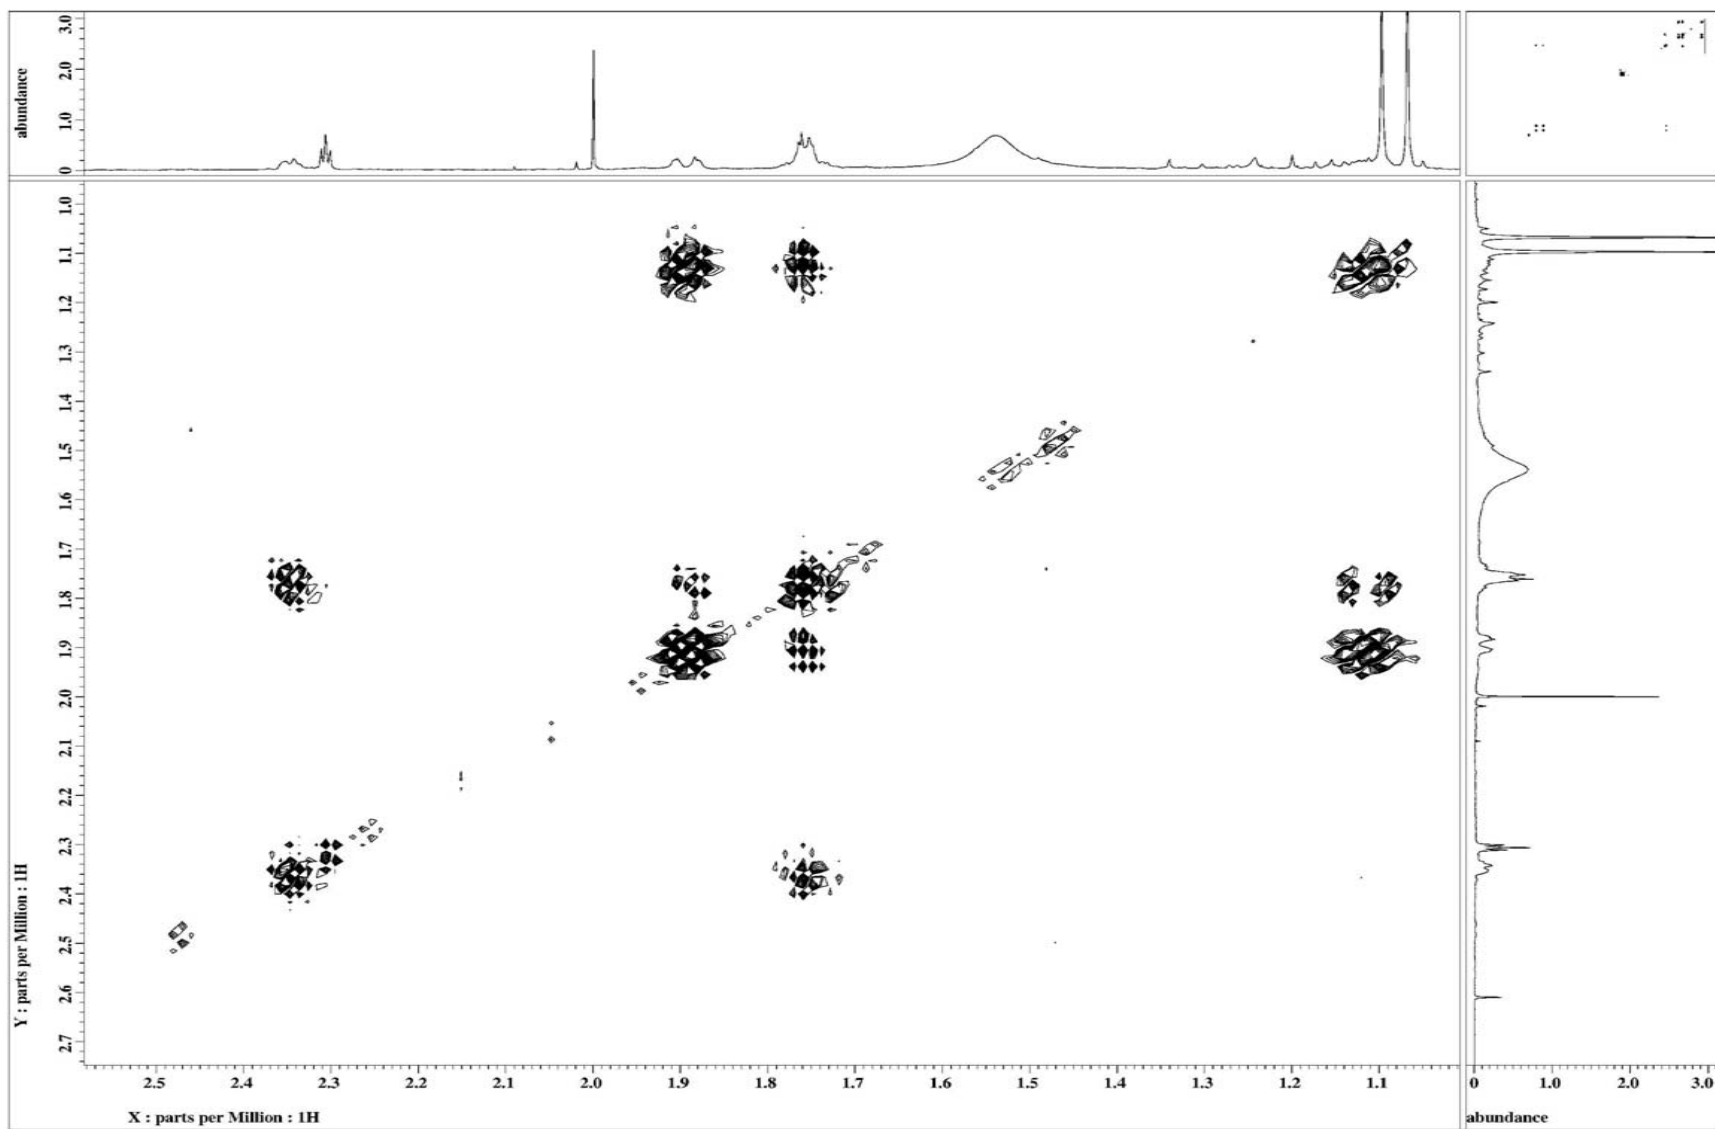

S22: gHMBC spectrum of neopetrosiquinone B (2), 600 MHz, CDCl<sub>3</sub>

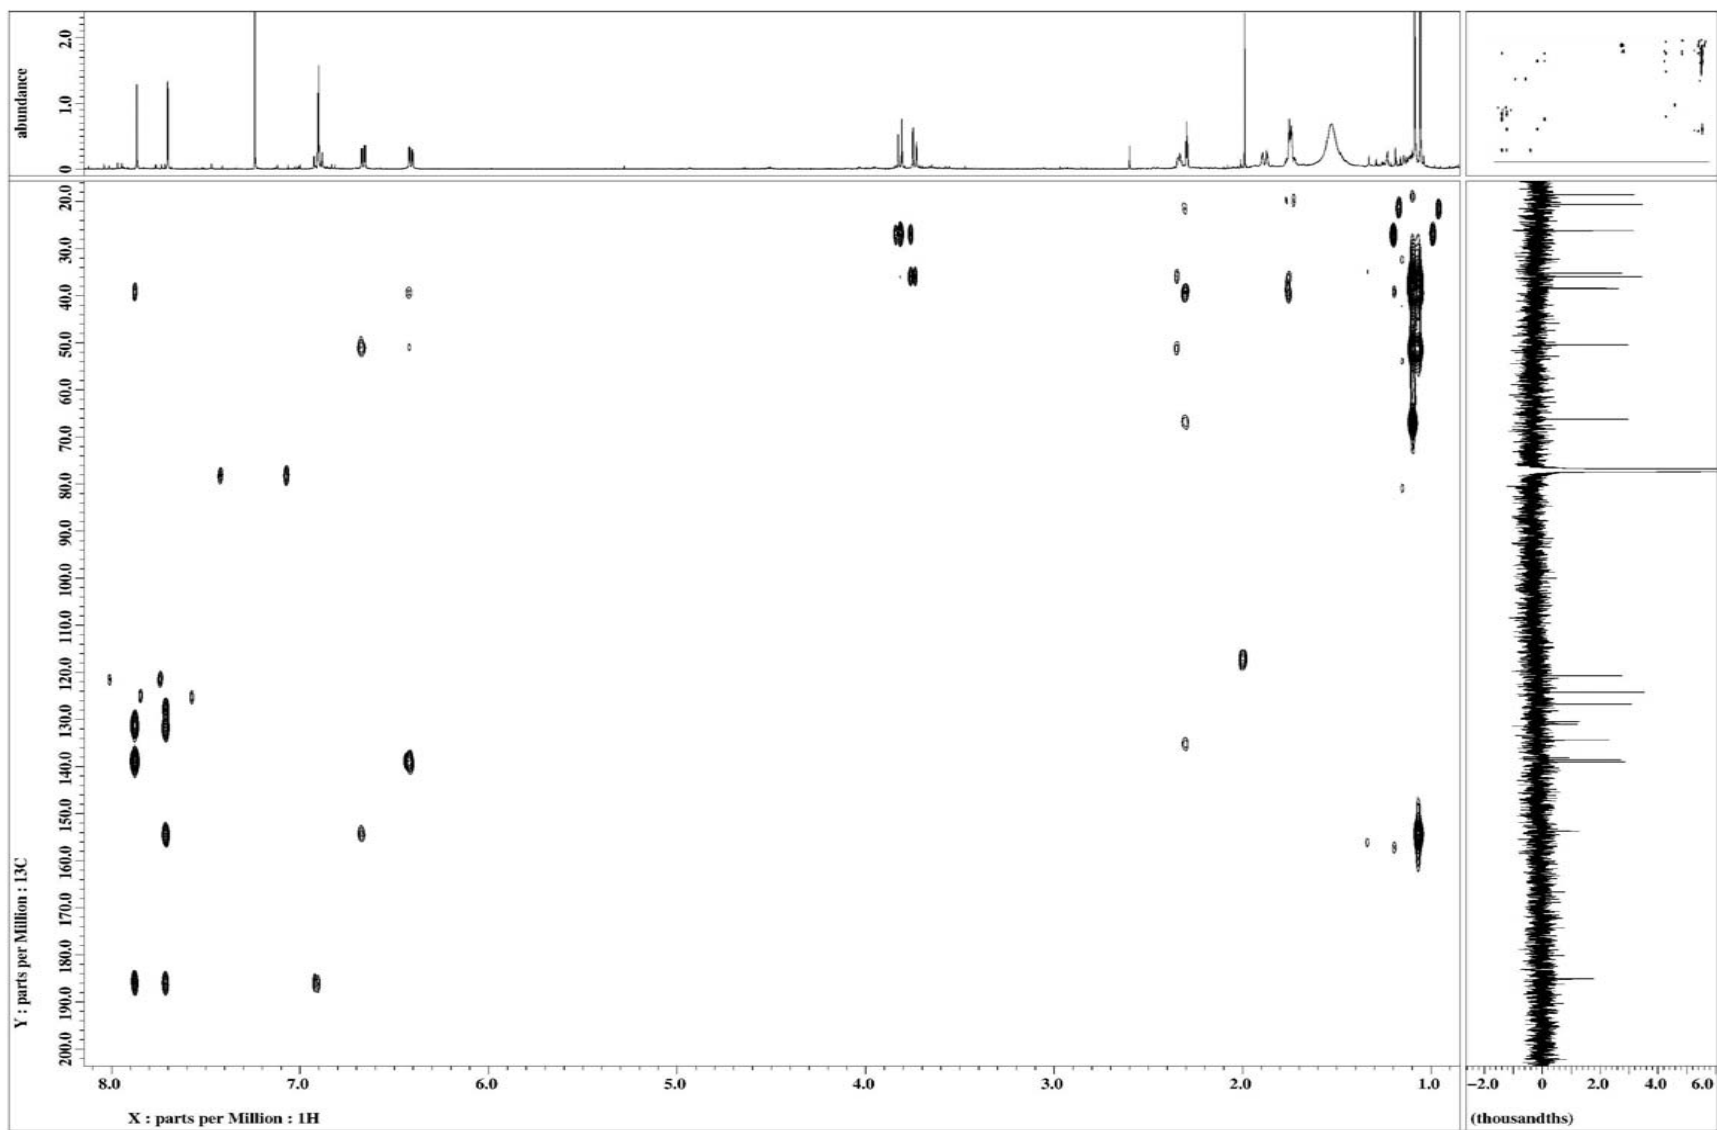

S23: NOESY spectrum of neopetrosiquinone B (**2**), 600 MHz, CDCl<sub>3</sub>

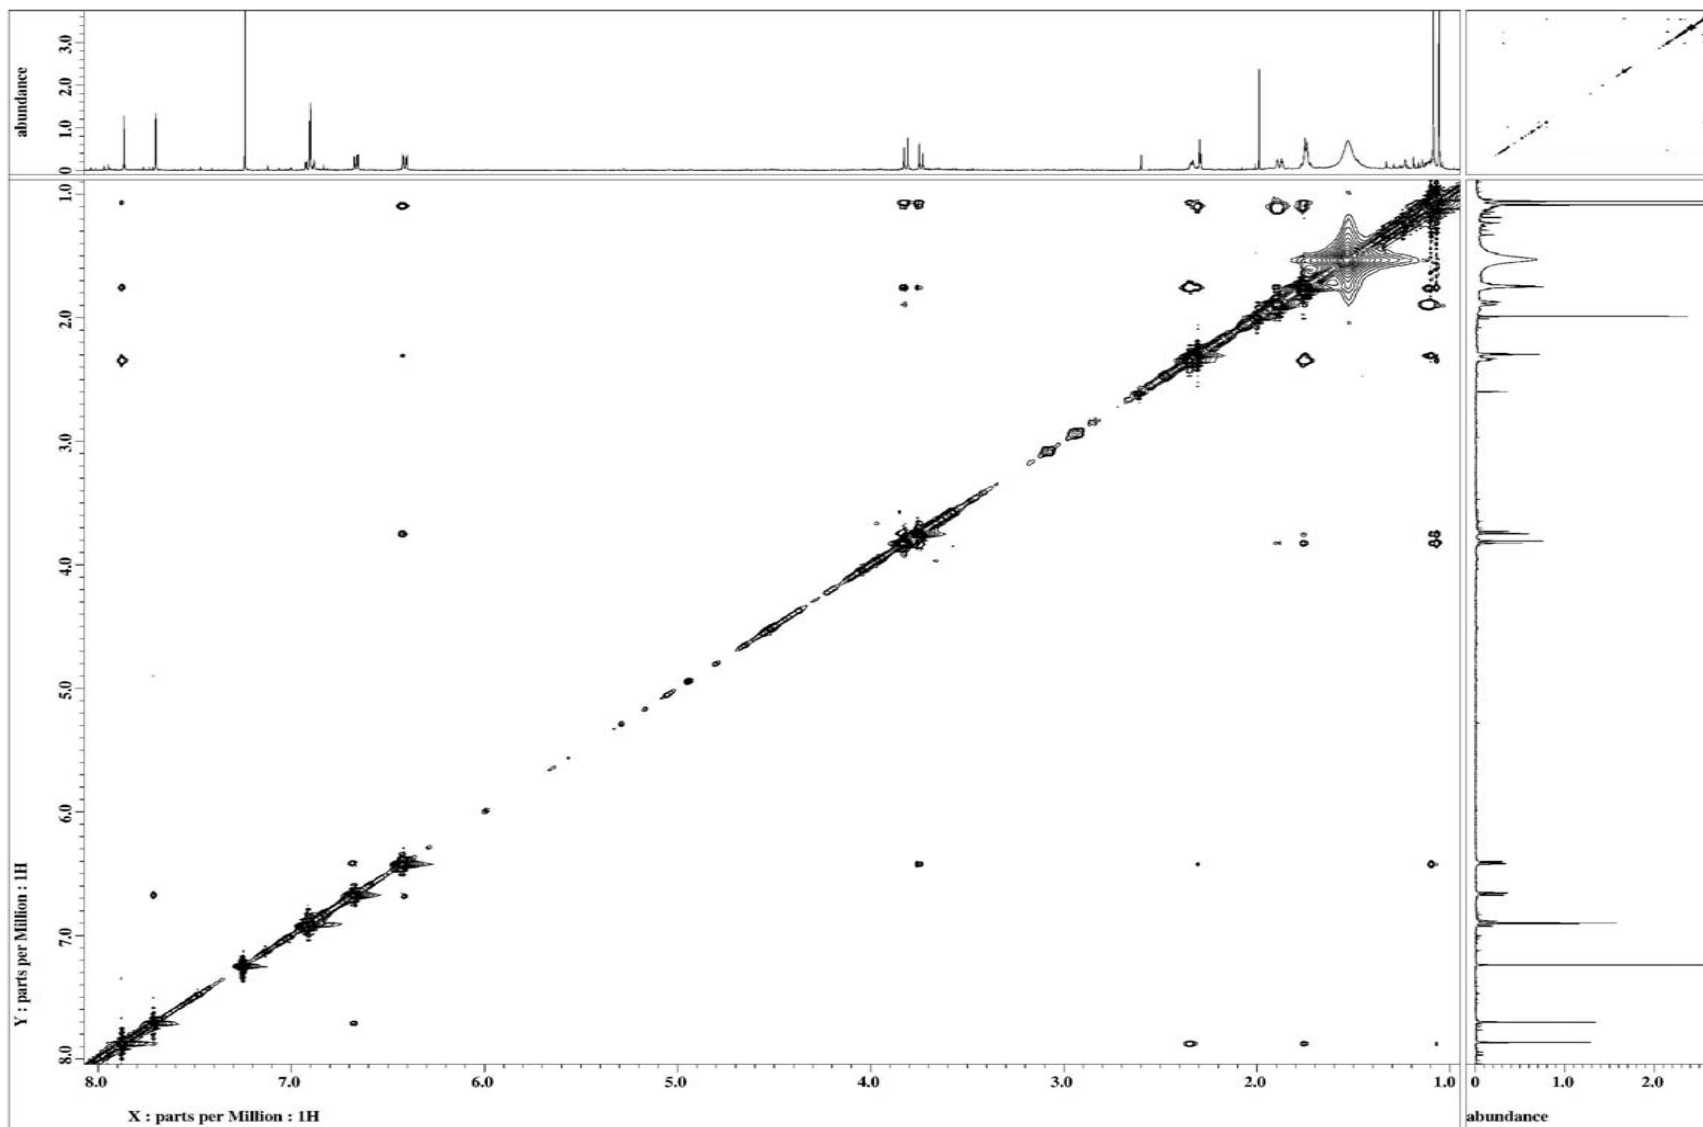



S24: TOCSY spectrum of neopetrosiquinone B (2), 600 MHz, CDCl<sub>3</sub>

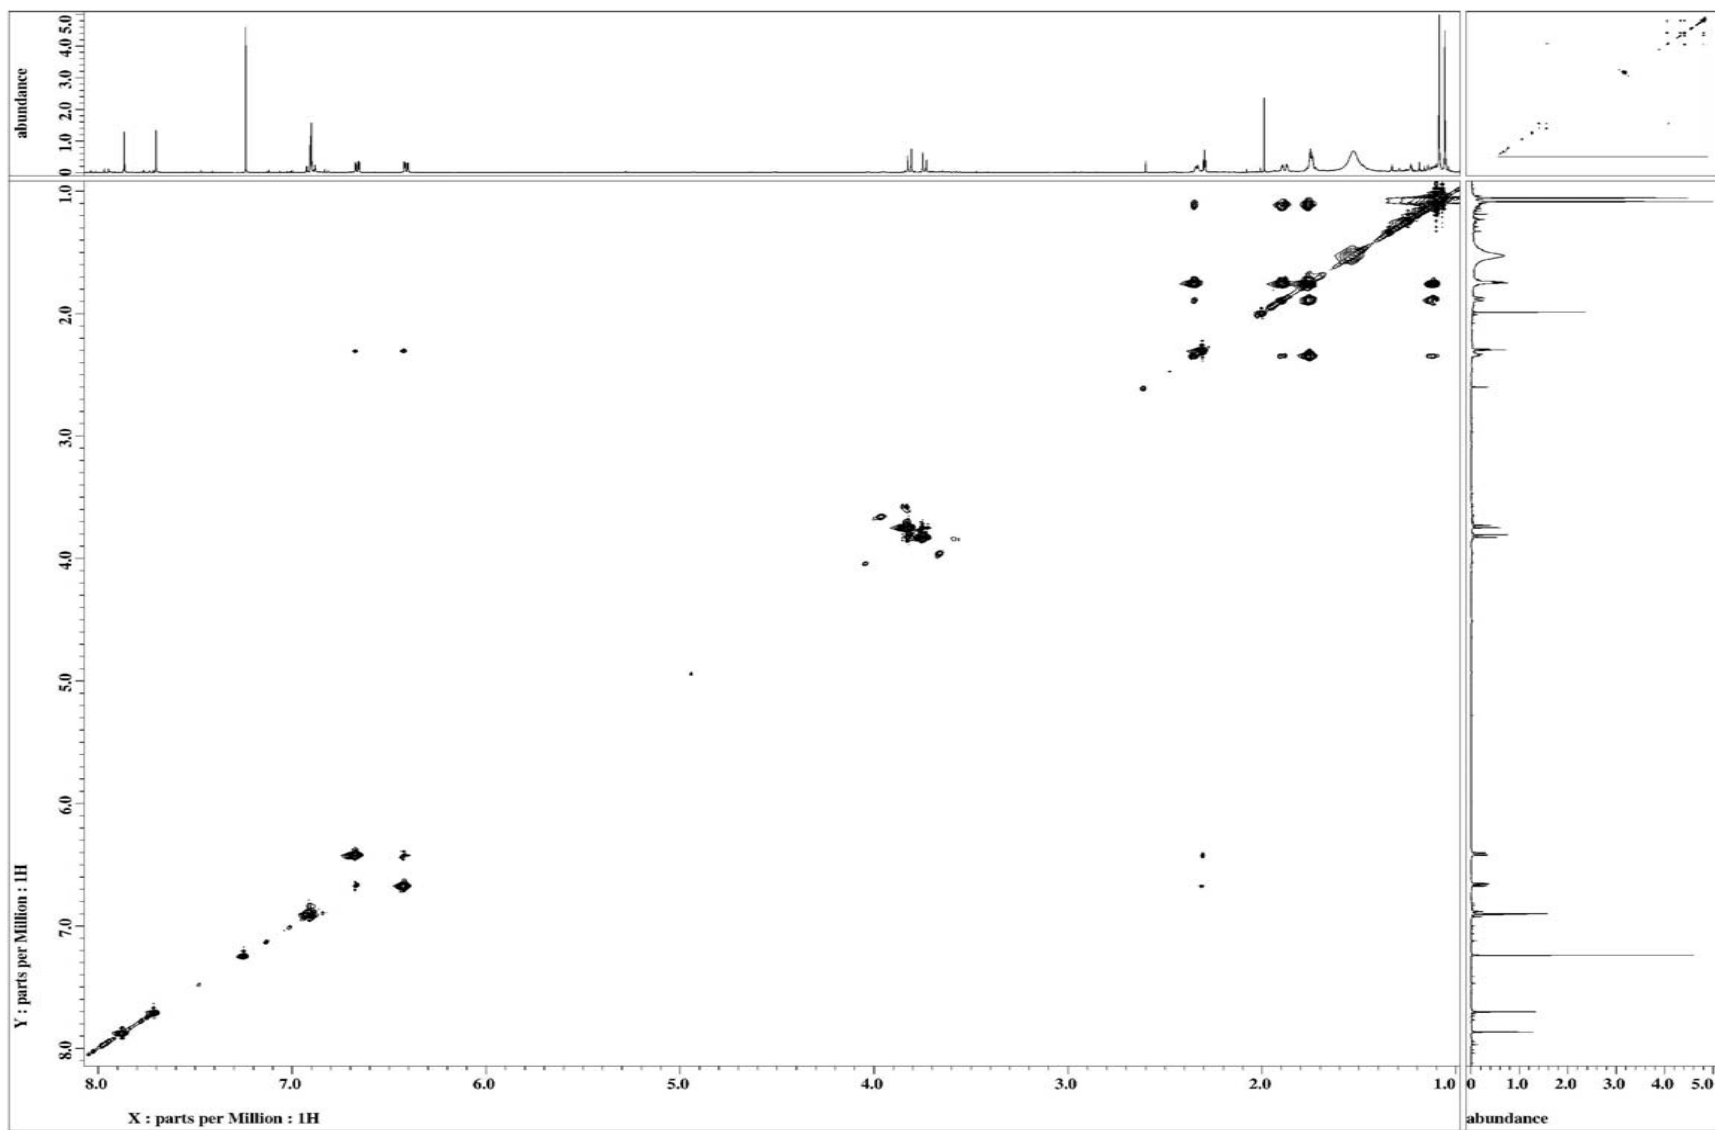

S25: <sup>1</sup>H and <sup>13</sup>C NMR Data for neopetrosiquinone B (2)

| Position |   | $\delta_C$ , mult.     | $\delta_H$ , <i>J</i> (Hz)  | COSY       | HMBC <sup>a</sup> | NOESY          | TOCSY   |
|----------|---|------------------------|-----------------------------|------------|-------------------|----------------|---------|
| 1        | A | 36.1, CH <sub>2</sub>  | 2.33, br m                  |            | 3, 5, 21          | 11, 21         |         |
|          | B |                        | 1.75, br m                  | 1A         |                   |                | 1A      |
| 2        |   | 18.7, CH <sub>2</sub>  | 1.75, br m                  | 1A, 3A, 3A | 4, 10             |                | 1A, 3AB |
| 3        | A | 35.3, CH <sub>2</sub>  | 1.88, br d (15.1)           | 3A         |                   | 3B             | 3B      |
|          | B |                        | 1.11, br m                  | 3A         | 2                 | 1A, 3A, 19AB   | 1A, 3A  |
| 4        |   | 38.6, qC               |                             |            |                   |                |         |
| 5        |   | 50.6, CH               | 2.29, t (3.4)               | 6          | 4, 6, 19, 20, 21  | 6, 20          | 6, 20   |
| 6        |   | 134.5, CH              | 6.42, dd (9.6, 2.8)         | 5, 7       | 4, 5, 8           | 5, 7, 19, 20   | 7       |
| 7        |   | 126.9, CH              | 6.67 dd (9.6, 3.4)          | 5, 6       | 5, 9              | 6, 18          | 6       |
| 8        |   | 138.7, qC              |                             |            |                   |                |         |
| 9        |   | 153.8, qC              |                             |            |                   |                |         |
| 10       |   | 38.5, qC               |                             |            |                   |                |         |
| 11       |   | 120.8, CH              | 7.87, s                     |            | 8, 10, 13/16, 17  | 1A, 21         |         |
| 12       |   | 131.2, qC <sup>c</sup> |                             |            |                   |                |         |
| 13       |   | 185.2, qC              |                             |            |                   |                |         |
| 14       |   | 139.1, CH <sup>b</sup> | 6.91, d (10.3) <sup>b</sup> |            | 13/16             |                |         |
| 15       |   | 138.6, CH <sup>b</sup> | 6.89, d (10.3) <sup>b</sup> |            | 13/16             |                |         |
| 16       |   | 185.2, qC              |                             |            |                   |                |         |
| 17       |   | 130.5, qC <sup>c</sup> |                             |            |                   |                |         |
| 18       |   | 124.3, CH              | 7.70, s                     |            | 7, 9, 12, 13/16   | 7              |         |
| 19       | A | 66.3, CH <sub>2</sub>  | 3.81, d (11.3)              | 19B        | 20                | 6, 19B, 21     | 19B     |
|          | B |                        | 3.74, d (11.3)              | 19A        | 3, 20             | 6, 19A, 21     | 19A     |
| 20       |   | 26.3, CH <sub>3</sub>  | 1.09, s                     |            | 3, 4, 5, 19       | 3A, 5, 6, 19AB |         |
| 21       |   | 20.8, CH <sub>3</sub>  | 1.06, s                     |            | 1, 5, 9, 10       | 1A, 11, 19AB   |         |

<sup>a</sup>HMBC correlations, optimized for 8 Hz, are from proton(s) stated to the indicated carbon ; <sup>b</sup>AB spin system, assignments may be interchanged; <sup>c</sup>Assignments may be interchanged

S26: Structure of neopetrosiquinone B (2) with chemical shifts on structure

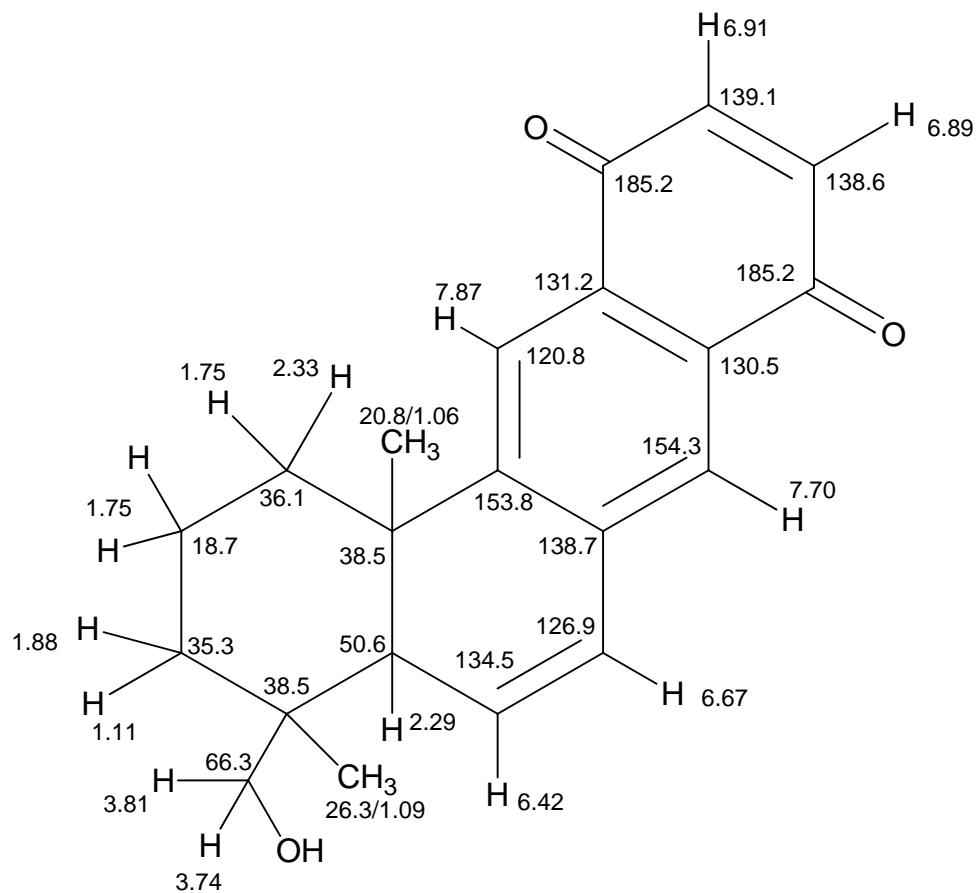

Supplement: NIHMS333370-supplement-01.pdf [file NIHMS333370-supplement-01.pdf]
